# Supplementary material for: Au(iii)/TPPMS-catalyzed Friedel–Crafts benzylation of deactivated N-alkylanilines in water
Source: Royal Society of Chemistry journal article supplement (doi:10.1039/d4ob01234h), 2024-01-01

## Supporting Information

### **Au(III)/TPPMS-catalyzed Friedel–Crafts Benzylation of Deactivated N-alkylanilines in Water**

**Hidemasa Hikawa\***, Akane Fukuda, Kazuma Kondou, Taku Nakayama, Tomokatsu Enda, Shoko Kikkawa and Isao Azumaya\*

*Faculty of Pharmaceutical Sciences, Toho University, Funabashi, Chiba 274-8510, Japan  
hidemasa.hikawa@phar.toho-u.ac.jp and isao.azumaya@phar.toho-u.ac.jp*

|                                                                                |                |
|--------------------------------------------------------------------------------|----------------|
| <b>Table of contents</b>                                                       | <b>S1</b>      |
| <b>General methods</b>                                                         | <b>S2</b>      |
| <b>Scheme S1. Substrate scope.</b>                                             | <b>S2-8</b>    |
| <b>Table S1. Optimization of dehydrative Friedel–Crafts benzylation.</b>       | <b>S9</b>      |
| <b>Scheme S2. Hammett study.</b>                                               | <b>S10</b>     |
| <b>Scheme S3. Reaction progress.</b>                                           | <b>S11-12</b>  |
| <b>X-ray structure of 3a.</b>                                                  | <b>S13-S14</b> |
| <b>Copies of <sup>1</sup>H and <sup>13</sup>C NMR spectra of all compounds</b> | <b>S15-S31</b> |

## General Methods.

All of the starting materials and solvents were purchased from Sigma–Aldrich Japan, FUJIFILM Wako Pure Chemical Co., Nacalai Tesque, Inc., and TCI Co., Ltd. All commercially available reagents and solvents (guaranteed reagents) were used without further purification. CHROMATOREX Q-PACK SI50 (Fuji Silysia Chemical Ltd, Japan) was used for flash column chromatography. All melting points were determined using a Yanako micro melting point apparatus without correction. <sup>1</sup>H NMR (400 MHz) and <sup>13</sup>C NMR (100 MHz) spectra were recorded on a JEOL ECS400 spectrometer. IR spectra were measured with a JASCO FT/IR-4100 spectrometer. Mass spectra were obtained using a JEOL the JMS-700 MStation Mass Spectrometer.

### Scheme S1. Substrate scope.

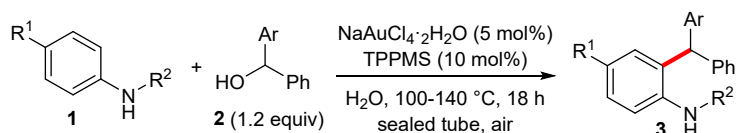

**General procedure:** A mixture of anilines **1** (1 mmol), alcohols **2** (1.2 mmol), NaAuCl<sub>4</sub>·2H<sub>2</sub>O (5 mol%) and TPPMS (10 mol%) in water (4 mL) was stirred at 90–140 °C for 18 h in a sealed tube under air. After cooling, the reaction mixture was extracted with EtOAc. The organic layer was dried over Na<sub>2</sub>SO<sub>4</sub> and concentrated in vacuo. The residue was purified by flash column chromatography (silica gel, hexanes/EtOAc) to give desired product **3**.

### 2-Benzhydryl-*N*-methyl-4-nitroaniline **3a**

Prepared according to the general procedure by using *N*-methyl-4-nitroaniline (152.2 mg, 1.0 mmol) and benzhydrol (221.1 mg, 1.2 mmol) in 4 mL of water at 100 °C for 18 h. The desired product **3a** was obtained in 80% yield (255.8 mg) as a yellow solid.

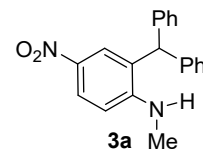

mp: 160–162 °C; <sup>1</sup>H NMR (400 MHz, CDCl<sub>3</sub>): δ 2.83 (d, *J*=5.0 Hz, 3H), 4.32 (brq, *J*=5.0 Hz, 1H), 5.30 (s, 1H), 6.59 (d, *J*=9.2 Hz, 1H), 7.05–7.11 (m, 4H), 7.24–7.40 (m, 7H), 7.56 (dd, *J*=2.6, 0.7 Hz, 1H), 8.12 (dd, *J*=9.0, 2.6 Hz, 1H); <sup>13</sup>C NMR (100 MHz, DMSO-*d*<sub>6</sub>): δ 30.7, 49.5, 109.3, 125.5, 125.8, 126.7, 127.2, 127.3, 127.6, 128.6, 129.1, 129.7, 136.1, 142.3, 152.9; MS (FAB): *m/z* 319 [M+H]<sup>+</sup>; Anal. Calcd. for C<sub>20</sub>H<sub>18</sub>N<sub>2</sub>O<sub>2</sub>: C, 75.45; H, 5.70; N, 8.80, Found: C, 75.46; H, 5.62; N, 8.77.

### ***N*-Methyl-4-nitro-2-[phenyl(*p*-tolyl)methyl]aniline 3b**

Prepared according to the general procedure by using *N*-methyl-4-nitroaniline (154.1 mg, 1.0 mmol) and 4-methylbenzhydrol (238.2 mg, 1.2 mmol) in 4 mL of water at 100 °C for 18 h. The desired product **3b** was obtained in 74% yield (244.9 mg) as a yellow solid.

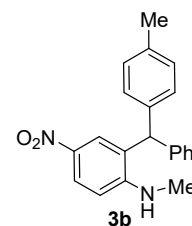

mp: 140–141 °C; FT-IR (KBr, cm<sup>-1</sup>): 3450, 1586; <sup>1</sup>H NMR (400 MHz, CDCl<sub>3</sub>): δ 2.35 (s, 3H), 2.84 (s, 3H), 4.36 (brs, 1H), 5.27 (s, 1H), 6.59 (d, *J*=9.2 Hz, 1H), 6.97 (d, *J*=8.0 Hz, 2H), 7.08 (d, *J*=6.6 Hz, 2H), 7.13 (d, *J*=8.2 Hz, 2H), 7.27–7.35 (m, 3H), 7.58 (d, *J*=2.5 Hz, 1H), 8.13 (dd, *J*=9.0, 2.6 Hz, 1H); <sup>13</sup>C NMR (100 MHz, CDCl<sub>3</sub>): δ 21.1, 30.6, 51.6, 108.6, 125.0, 126.1, 127.3, 127.6, 128.9, 129.1, 129.2, 129.7, 137.0, 137.7, 137.9, 141.0, 151.7; MS (FAB): *m/z* 319 [M+H]<sup>+</sup>; Anal. Calcd. for C<sub>21</sub>H<sub>20</sub>N<sub>2</sub>O<sub>2</sub>: C, 75.88; H, 6.06; N, 8.43, Found: C, 75.83; H, 5.97; N, 8.41.

### ***N*-Methyl-4-nitro-2-[phenyl(*o*-tolyl)methyl]aniline 3c**

Prepared according to the general procedure by using *N*-methyl-4-nitroaniline (156.3 mg, 1.0 mmol) and 2-methylbenzhydrol (231.2 mg, 1.2 mmol) in 4 mL of water at 120 °C for 18 h. The desired product **3c** was obtained in 57% yield (187.8 mg) as a yellow solid.

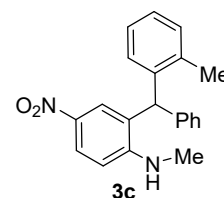

mp: 134–136 °C; FT-IR (KBr, cm<sup>-1</sup>): 3417, 3056, 2923, 1587; <sup>1</sup>H NMR (400 MHz, CDCl<sub>3</sub>): δ 2.18 (s, 3H), 2.84 (s, 3H), 4.22 (brs, 1H), 5.36 (s, 1H), 6.62 (d, *J*=9.2 Hz, 1H), 6.79 (d, *J*=7.6 Hz, 1H), 7.06 (d, *J*=7.6 Hz, 2H), 7.11–7.16 (m, 1H), 7.21 (d, *J*=3.9 Hz, 2H), 7.27–7.36 (m, 4H), 7.49 (dd, *J*=2.5, 0.5 Hz, 1H), 8.13 (dd, *J*=9.0, 2.8 Hz, 1H); <sup>13</sup>C NMR (100 MHz, CDCl<sub>3</sub>): δ 19.6, 30.7, 48.6, 108.7, 125.0, 125.8, 126.5, 127.3, 127.4, 127.5, 128.7, 129.0, 129.5, 131.0, 136.5, 138.0, 139.0, 140.1, 151.7; MS (FAB): *m/z* 333 [M+H]<sup>+</sup>; Anal. Calcd. for C<sub>21</sub>H<sub>20</sub>N<sub>2</sub>O<sub>2</sub>: C, 75.88; H, 6.06; N, 8.43, Found: C, 75.88; H, 5.96; N, 8.41.

### **2-[(4-Methoxyphenyl)(phenyl)methyl]-*N*-methyl-4-nitroaniline 3d**

Prepared according to the general procedure by using *N*-methyl-4-nitroaniline (153.1 mg, 1.0 mmol) and 4-methoxybenzhydrol (257.7 mg, 1.2 mmol) in 4 mL of water at 100 °C for 18 h. The desired product **3d** was obtained in 70% yield (245.2 mg) as a yellow solid.

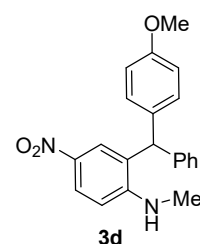

mp: 115–117 °C; FT-IR (KBr, cm<sup>-1</sup>): 3447, 3000, 2834, 1586; <sup>1</sup>H NMR (400 MHz, CDCl<sub>3</sub>): δ 2.84 (s, 3H), 3.79 (s, 3H), 4.36 (brs, 1H), 5.25 (s, 1H), 6.59 (d, *J*=8.9 Hz, 1H), 6.86 (d, *J*=8.7 Hz, 2H), 7.00 (d, *J*=8.7 Hz, 2H), 7.08 (d, *J*=6.9 Hz, 2H), 7.28–7.35 (m, 3H), 7.57 (d, *J*=2.5 Hz, 1H), 8.13 (dd, *J*=9.0, 2.8 Hz, 1H); <sup>13</sup>C NMR (100 MHz, CDCl<sub>3</sub>): δ 30.6, 51.1, 55.3, 108.6, 114.4, 125.0, 126.0, 127.3, 127.8, 129.0, 129.1, 130.2, 132.7, 137.9, 141.2, 151.7, 158.8; MS (FAB): *m/z* 349 [M+H]<sup>+</sup>; Anal. Calcd. for C<sub>21</sub>H<sub>20</sub>N<sub>2</sub>O<sub>3</sub>: C, 72.40; H, 5.79; N, 8.04, Found: C, 72.29; H, 5.68; N,

7.82.

### 2-[(4-Chlorophenyl)(phenyl)methyl]-*N*-methyl-4-nitroaniline **3e**

Prepared according to the general procedure by using *N*-methyl-4-nitroaniline (152.9 mg, 1.0 mmol) and 4-chlorobenzhydrol (538.3 mg, 2.4 mmol) in 4 mL of water at 140 °C for 18 h. The desired product **3e** was obtained in 50% yield (177.1 mg) as a yellow solid.

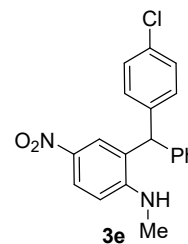

mp: 133–135 °C; FT-IR (KBr,  $\text{cm}^{-1}$ ): 3433, 3024, 2921, 1587;  $^1\text{H}$  NMR (400 MHz,  $\text{CDCl}_3$ ):  $\delta$  2.85 (s, 3H), 4.30 (s, 1H), 5.28 (s, 1H), 6.62 (d,  $J=9.2$  Hz, 1H), 7.02 (d,  $J=8.2$  Hz, 2H), 7.06–7.08 (m, 2H), 7.30–7.36 (m, 5H), 7.55 (dd,  $J=2.8, 0.7$  Hz, 1H), 8.14 (dd,  $J=9.2, 2.8$  Hz, 1H);  $^{13}\text{C}$  NMR (100 MHz,  $\text{CDCl}_3$ ):  $\delta$  30.6, 51.2, 108.8, 125.2, 126.0, 126.8, 127.6, 129.1, 129.2, 130.6, 133.3, 137.9, 139.4, 140.3, 151.6; MS (FAB):  $m/z$  353  $[\text{M}+\text{H}]^+$ ; Anal. Calcd. for  $\text{C}_{20}\text{H}_{17}\text{ClN}_2\text{O}_2$ : C, 68.09; H, 4.86; N, 7.94, Found: C, 67.99; H, 4.81; N, 7.98.

### 2-[Bis(4-methoxyphenyl)methyl]-*N*-methyl-4-nitroaniline **3f**

Prepared according to the general procedure by using *N*-methyl-4-nitroaniline (154.1 mg, 1.0 mmol) and 4,4'-dimethoxybenzhydrol (293.4 mg, 1.2 mmol) in 4 mL of water at 140 °C for 18 h. The desired product **3f** was obtained in 54% yield (203.6 mg) as a yellow solid.

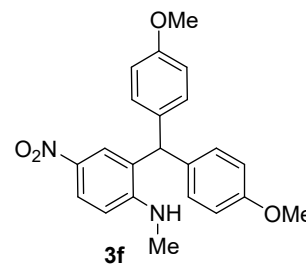

mp: 152–153 °C;  $^1\text{H}$  NMR (400 MHz,  $\text{CDCl}_3$ ):  $\delta$  2.83 (s, 3H), 3.80 (s, 6H), 4.38 (brs, 1H), 5.19 (s, 1H), 6.58 (d,  $J=9.2$  Hz, 1H), 6.85 (d,  $J=8.7$  Hz, 4H), 6.98 (d,  $J=8.7$  Hz, 4H), 7.57 (dd,  $J=2.6, 0.7$  Hz, 1H), 8.12 (dd,  $J=9.0, 2.8$  Hz, 1H);  $^{13}\text{C}$  NMR (100 MHz,  $\text{CDCl}_3$ ):  $\delta$  30.6, 50.3, 55.3, 108.5, 114.3, 124.9, 125.9, 128.1, 130.1, 133.1, 137.9, 151.7, 158.7; MS (FAB):  $m/z$  379  $[\text{M}+\text{H}]^+$ ; Anal. Calcd. for  $\text{C}_{22}\text{H}_{22}\text{N}_2\text{O}_4$ : C, 69.83; H, 5.86; N, 7.40, Found: C, 69.58; H, 5.78; N, 7.44.

### 2-[Bis(4-fluorophenyl)methyl]-*N*-methyl-4-nitroaniline **3g**

Prepared according to the general procedure by using *N*-methyl-4-nitroaniline (153.7 mg, 1.0 mmol) and 4,4'-difluorobenzhydrol (526.3 mg, 2.4 mmol) in 4 mL of water at 140 °C for 18 h. The desired product **3g** was obtained in 83% yield (294.5 mg) as a yellow solid.

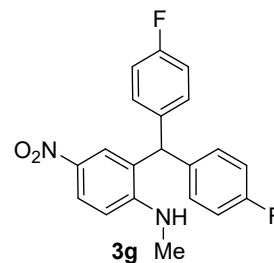

mp: 148–150 °C;  $^1\text{H}$  NMR (400 MHz,  $\text{CDCl}_3$ ):  $\delta$  2.86 (d,  $J=5.0$  Hz, 3H), 4.24 (brq,  $J=5.0$  Hz, 1H), 5.28 (s, 1H), 6.62 (d,  $J=9.2$  Hz, 1H), 7.04 (d,  $J=6.9$  Hz, 8H), 7.51 (d,  $J=2.8$  Hz, 1H), 8.15 (dd,  $J=9.0, 2.8$  Hz, 1H);  $^{13}\text{C}$  NMR (100 MHz,  $\text{CDCl}_3$ ):  $\delta$  30.7, 50.5, 109.0, 116.2 (d,  $J_{\text{CF}} = 22.0$  Hz), 125.4, 126.0, 127.1, 130.8 (d,  $J_{\text{CF}}=7.7$  Hz), 136.5 (d,  $J_{\text{CF}}=3.8$  Hz), 138.1, 151.6,

162.2 (d,  $J_{CF}$ =247.3 Hz); MS (FAB):  $m/z$  355  $[M+H]^+$ . Anal. Calcd. for  $C_{20}H_{16}F_2N_2O_2$ : C, 67.79; H, 4.55; N, 7.91, Found: C, 67.80; H, 4.57; N, 7.91.

### (*E*)-2-(1,3-Diphenylallyl)-*N*-methyl-4-nitroaniline **3h** <sup>1</sup>

Prepared according to the general procedure by using *N*-methyl-4-nitroaniline (156.8 mg, 1.0 mmol) and *trans*-1,3-diphenyl-2-propen-1-ol (257.1 mg, 1.2 mmol) in 4 mL of water at 100 °C for 18 h. The desired product **3h** was obtained in 82% yield (290.4 mg) as a yellow solid.

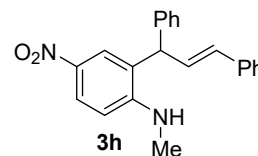

mp: 101–103 °C; <sup>1</sup>H NMR (400 MHz, CDCl<sub>3</sub>): δ 2.88 (s, 3H), 4.48 (s, 1H), 4.76 (d,  $J$ =6.9 Hz, 1H), 6.29 (dd,  $J$ =15.9, 1.1 Hz, 1H), 6.59–6.64 (m, 2H), 7.20–7.38 (m, 10H), 8.02 (dd,  $J$ =2.8, 0.5 Hz, 1H), 8.16 (dd,  $J$ =9.0, 2.8 Hz, 1H); <sup>13</sup>C NMR (100 MHz, CDCl<sub>3</sub>): δ 30.6, 49.3, 108.8, 125.2, 125.3, 126.4, 126.5, 127.6, 127.8, 128.5, 128.6, 129.2, 129.5, 132.7, 136.5, 137.9, 140.0, 151.8; MS (FAB):  $m/z$  345  $[M+H]^+$ ; Anal. Calcd. for  $C_{22}H_{20}N_2O_2$ : C, 76.72; H, 5.85; N, 8.13, Found: C, 76.36; H, 5.87; N, 8.05.

### 3-Benzhydryl-4-(methylamino)benzonitrile **3i**

Prepared according to the general procedure by using 4-(Methylamino)benzonitrile (134.4 mg, 1.0 mmol) and benzhydrol (440.9 mg, 2.4 mmol) in 4 mL of water at 140 °C for 18 h. The desired product **3i** was obtained in 98% yield (291.6 mg) as a white solid.

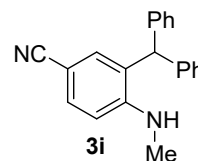

mp: 150-152 °C; <sup>1</sup>H NMR (400 MHz, CDCl<sub>3</sub>): δ 2.78 (d,  $J$ =4.6 Hz, 3H), 4.06 (brd,  $J$ =4.4 Hz, 1H), 5.29 (s, 1H), 6.62 (d,  $J$  = 8.5 Hz, 1H), 6.86 (d,  $J$  = 2.1 Hz, 1H), 7.05–7.10 (m, 4H), 7.27–7.40 (m, 6H), 7.48 (dd,  $J$  = 8.5, 1.8 Hz, 1H); <sup>13</sup>C NMR (100 MHz, CDCl<sub>3</sub>): δ 30.4, 51.7, 98.4, 109.7, 120.8, 126.5, 127.2, 127.3, 128.3, 128.5, 128.6, 128.9, 129.3, 129.4, 132.5, 133.5, 141.0, 149.8; MS (FAB):  $m/z$  299  $[M+H]^+$ ; Anal. Calcd. for  $C_{21}H_{18}N_2$ : C, 84.53; H, 6.08; N, 9.39, Found: C, 84.58; H, 6.07; N, 8.31.

### (*E*)-3-(1,3-Diphenylallyl)-4-(methylamino)benzoic acid **3j**

Prepared according to the general procedure by using 4-(methylamino)benzoic acid (152.8 mg, 1.0 mmol) and *trans*-1,3-diphenyl-2-propen-1-ol (252.9 mg, 1.2 mmol) in 4 mL of water at 120 °C for 18 h.

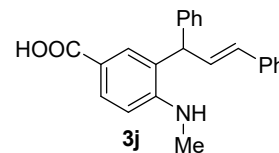

The desired product **3j** was obtained in 58% yield (201.7 mg) as a white solid.

mp: 194–195 °C; <sup>1</sup>H NMR (400 MHz, CDCl<sub>3</sub>): δ 2.81 (s, 3H), 4.78 (d,  $J$ =6.9 Hz, 1H), 6.28 (d,  $J$ =16 Hz, 1H), 6.63–6.68 (m, 2H), 7.22–7.38 (m, 10H), 7.85 (d,  $J$ =1.8 Hz, 1H), 7.99 (dd,  $J$ =8.7, 2.1 Hz, 1H); <sup>13</sup>C NMR (100 MHz, CDCl<sub>3</sub>): δ 30.5, 49.5, 109.3, 116.9, 126.2, 126.5, 127.2, 127.5, 128.6, 128.9, 130.5, 131.2, 131.3, 132.1, 136.9, 140.9, 151.0, 171.9; MS (FAB):  $m/z$  344  $[M+H]^+$ ; Anal. Calcd. for  $C_{23}H_{21}NO_2$ : C, 80.44; H, 6.16; N, 4.08, Found: C, 79.91; H, 6.19; N, 4.01.



### Methyl (*E*)-3-(1,3-diphenylallyl)-4-(methylamino)benzoate **3k**

Prepared according to the general procedure by using methyl 4-(methylamino)benzoate (165.2 mg, 1.0 mmol) and *trans*-1,3-diphenyl-2-propen-1-ol (252.9 mg, 1.2 mmol) in 4 mL of water at 120 °C for 18 h.

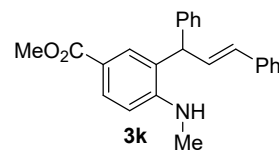

The desired product **3k** was obtained in 67% yield (239.9 mg) as a white solid.

mp: 56–58 °C; <sup>1</sup>H NMR (400 MHz, CDCl<sub>3</sub>): δ 2.80 (s, 3H), 3.83 (s, 3H), 4.08 (s, 1H), 4.78 (d, *J*=6.9 Hz, 1H), 6.27 (d, *J*=16.0 Hz, 1H), 6.63 (d, *J*=8.5 Hz, 1H), 6.66 (d, *J*=16.0, 7.1 Hz, 1H), 7.18–7.40 (m, 10H), 7.81 (d, *J*=1.8 Hz, 1H), 7.93 (dd, *J*=8.5, 2.1 Hz, 1H); <sup>13</sup>C NMR (100 MHz, CDCl<sub>3</sub>): δ 30.5, 49.5, 51.6, 109.3, 118.0, 126.2, 126.5, 127.1, 127.5, 128.5, 128.6, 128.9, 130.4, 130.6, 130.7, 132.0, 137.0, 141.0, 150.4, 167.6; MS (EI): *m/z* (%): 357 (M<sup>+</sup>, 39.6), 266 (100); HRMS (EI): *m/z* (M<sup>+</sup>) calcd for C<sub>24</sub>H<sub>23</sub>NO<sub>2</sub> 357.1729, found 357.1729.

### 1-[3-Benzhydryl-4-(methylamino)phenyl]ethan-1-one **3l**

Prepared according to the general procedure by using 1-[4-(methylamino)phenyl]ethan-1-one (149.2 mg, 1.0 mmol) and benzhydrol (221.1 mg, 1.2 mmol) in 4 mL of water at 120 °C for 18 h. The desired product **3l** was obtained in 61% yield (193.6 mg) as a white solid.

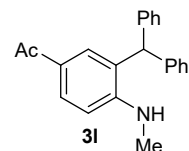

mp: 159–162 °C; <sup>1</sup>H NMR (400 MHz, CDCl<sub>3</sub>): δ 2.32 (s, 3H), 2.80 (s, 3H), 4.06 (brs, 1H), 5.35 (s, 1H), 6.63 (d, *J*=8.5 Hz, 1H), 7.08–7.12 (m, 4H), 7.23–7.35 (m, 7H), 7.86 (dd, *J*=8.7, 2.1 Hz, 1H); <sup>13</sup>C NMR (100 MHz, CDCl<sub>3</sub>): δ 25.9, 30.5, 52.0, 109.0, 126.2, 127.0, 128.7, 129.3, 130.8, 141.7, 150.6, 196.7; MS (EI): *m/z* (%): 315 (M<sup>+</sup>, 100); HRMS (EI): *m/z* (M<sup>+</sup>) calcd for C<sub>22</sub>H<sub>21</sub>NO 315.1623, found 315.1623.

### 2-Benzhydryl-*N*-ethyl-4-nitroaniline **3m**

Prepared according to the general procedure by using *N*-ethyl-4-nitroaniline (166.2 mg, 1.0 mmol) and benzhydrol (221.1 mg, 1.2 mmol) in 4 mL of water at 140 °C for 18 h. The desired product **3m** was obtained in 70% yield (238.0 mg) as a yellow solid.

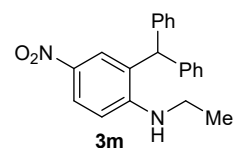

mp: 164–165 °C; <sup>1</sup>H NMR (400 MHz, CDCl<sub>3</sub>): δ 1.03 (t, *J*=7.1 Hz, 3H), 3.12 (q, *J*=7.1 Hz, 3H), 4.15 (brs, 1H), 5.28 (s, 1H), 6.57 (d, *J*=8.9 Hz, 1H), 7.08–7.13 (m, 4H), 7.25–7.36 (m, 6H), 7.57 (dd, *J*=2.5, 0.9 Hz, 1H), 8.09 (dd, *J*=9.2, 2.5 Hz, 1H); <sup>13</sup>C NMR (100 MHz, CDCl<sub>3</sub>): δ 14.1, 38.2, 52.3, 109.0, 125.1, 126.1, 127.3, 127.4, 129.0, 129.2, 137.7, 140.7, 151.0; MS (FAB): *m/z* 333 [M+H]<sup>+</sup>; Anal. Calcd. for C<sub>21</sub>H<sub>20</sub>N<sub>2</sub>O<sub>2</sub>: C, 75.88; H, 6.06; N, 8.43, Found: C, 75.78; H, 6.00; N, 8.41.

### 2-Benzhydryl-*N*-butyl-4-nitroaniline **3n**

Prepared according to the general procedure by using *N*-butyl-4-nitroaniline (198.2 mg, 1.0 mmol) and benzhydrol (226.6 mg, 1.2 mmol) in 4 mL of water at 140 °C for 18 h. The desired product **3n** was obtained in 76% yield (273.1 mg) as a yellow solid.

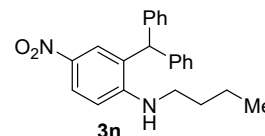

mp: 93–95 °C; <sup>1</sup>H NMR (400 MHz, CDCl<sub>3</sub>): δ 0.79 (t, *J*=7.6 Hz, 3H), 1.04 (sext, *J*=7.6 Hz, 2H), 1.38 (quin, *J*=7.3 Hz, 2H), 3.09 (t, *J*= 6.8 Hz, 2H), 4.28 (brs, 1H), 5.28 (s, 1H), 6.58 (d, *J*= 8.9 Hz, 1H), 7.12–7.14 (m, 4H), 7.26–7.38 (m, 6H), 7.58 (dd, *J*= 2.8, 0.7 Hz, 1H), 8.11 (dd, *J*= 9.2, 2.8 Hz, 1H); <sup>13</sup>C NMR (100 MHz, CDCl<sub>3</sub>): δ 13.6, 19.6, 30.6, 43.0, 52.4, 108.9, 125.1, 126.2, 127.3, 127.4, 129.0, 129.2, 137.6, 140.7, 151.0; MS (FAB): *m/z* 361 [M+H]<sup>+</sup>; Anal. Calcd. for C<sub>23</sub>H<sub>24</sub>N<sub>2</sub>O<sub>2</sub>: C, 76.64; H, 6.71; N, 7.77, Found: C, 76.75; H, 6.68; N, 7.79.

### 2-Benzhydryl-*N*-isopropyl-4-nitroaniline **3o**

Prepared according to the general procedure by using *N*-Isopropyl-4-nitroaniline (181.4 mg, 1.0 mmol) and benzhydrol (227.2 mg, 1.2 mmol) in 4 mL of water at 140 °C for 18 h. The desired product **3o** was obtained in 95% yield (328.1 mg) as a yellow solid.

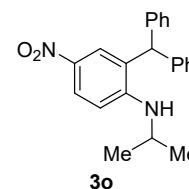

mp: 169–170 °C; <sup>1</sup>H NMR (400 MHz, CDCl<sub>3</sub>): δ 0.98 (d, *J*=6.2 Hz, 6H), 3.61 (sep, *J*=6.2 Hz, 1H), 4.14 (brs, 1H), 5.25 (s, 1H), 6.58 (d, *J*=9.4 Hz, 1H), 7.09–7.14 (m, 4H), 7.30–7.37 (m, 6H), 7.58 (dd, *J*=2.8, 0.7 Hz, 1H), 8.09 (dd, *J*=9.0, 2.8 Hz, 1H); <sup>13</sup>C NMR (100 MHz, CDCl<sub>3</sub>): δ 22.3, 44.3, 52.5, 109.3, 125.1, 126.3, 127.3, 127.4, 129.0, 129.2, 137.3, 140.6, 150.2; MS (FAB): *m/z* 347 [M+H]<sup>+</sup>; Anal. Calcd. for C<sub>22</sub>H<sub>22</sub>N<sub>2</sub>O<sub>2</sub>: C, 76.28; H, 6.40; N, 8.09, Found: C, 76.36; H, 6.4; N, 8.09.

### 2-[(2-Benzhydryl-4-nitrophenyl)amino]ethan-1-ol **3p** and

### 2-Benzhydryl-*N*-[2-(2,2-diphenylethoxy)ethyl]-4-nitroaniline **3p'**

Prepared according to the general procedure by using 2-[(4-nitrophenyl)amino]ethanol **1p** (183.4 mg, 1.0 mmol) and benzhydrol (222.0 mg, 1.2 mmol) in 4 mL of water at 120 °C for 18 h. The desired products **3p** and **3p'** were obtained in 54% yield (186.3 mg) and 26% yield (132.1 mg), respectively.

### 2-[(2-Benzhydryl-4-nitrophenyl)amino]ethan-1-ol **3p**

Yield: 186.3 mg (0.54 mmol); yellow solid; <sup>1</sup>H NMR (400 MHz, CDCl<sub>3</sub>): δ 1.09 (brs, 1H), 3.28 (t, *J*=5.0 Hz, 2H), 3.63 (t, *J*=5.5 Hz, 2H), 4.68 (brs, 1H), 5.35 (s, 1H), 6.62 (d, *J*=9.2 Hz, 1H), 7.12–7.15 (m, 4H), 7.26–7.37 (m, 6H), 7.60 (dd, *J*= 2.8, 0.9 Hz, 1H), 8.10 (dd, *J*=8.7, 2.8 Hz, 1H); <sup>13</sup>C NMR (100 MHz, CDCl<sub>3</sub>): δ 45.3, 52.2, 60.6, 109.2, 125.0, 126.2, 127.5, 128.0, 129.0, 129.2, 138.0, 140.6, 150.7; MS (FAB): *m/z* 349

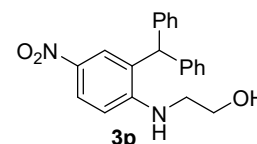



[M+H]<sup>+</sup>.

**2-Benzhydryl-N-(2-(benzhydryloxy)ethyl)-4-nitroaniline 3p'**

Yield: 132.1 mg (0.26 mmol), 26%; yellow solid; mp: 153-155 °C; <sup>1</sup>H

NMR (400 MHz, CDCl<sub>3</sub>): δ 3.35 (t, *J*=5.0 Hz, 2H), 3.52 (t, *J*=4.8 Hz,

2H), 4.81 (brs, 1H), 5.25 (s, 1H), 5.31 (s, 1H), 6.59 (d, *J*=9.2 Hz, 1H),

7.02–7.09 (m, 4H), 7.19–7.34 (m, 16H), 7.59 (d, *J*=2.8, 0.7 Hz, 1H), 8.08 (dd, *J*=9.0, 2.8 Hz, 1H);

<sup>13</sup>C NMR (100 MHz, CDCl<sub>3</sub>): δ 43.4, 52.0, 66.9, 84.2, 109.2, 124.9, 126.2, 126.8, 127.3, 127.7,

127.7, 128.5, 128.9, 129.2, 137.9, 140.1, 141.6, 150.8; MS (FAB): *m/z* 515 [M+H]<sup>+</sup>; Anal. Calcd. for

C<sub>35</sub>H<sub>32</sub>N<sub>2</sub>O<sub>3</sub>: C, 79.52; H, 6.10; N, 5.30, Found: C, 79.33; H, 5.93; N, 5.41.

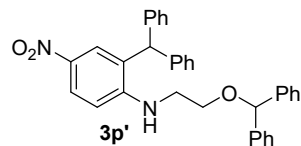

**References**

1. R. Nallagonda, M. Rehan, P. Ghorai, *Org. Lett.* **2014**, *16*, 4786–4789.

**Table S1.** Optimization of catalytic dehydrative Friedel–Crafts benzylation.<sup>a</sup>

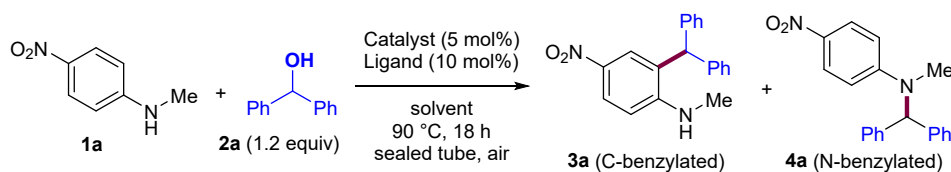

| Entry                 | Catalyst                                                   | Ligand             | Solvent               | NMR Yields (%) |           |
|-----------------------|------------------------------------------------------------|--------------------|-----------------------|----------------|-----------|
|                       |                                                            |                    |                       | <b>3a</b>      | <b>4a</b> |
| 1                     | Re <sub>2</sub> O <sub>7</sub>                             | TPPMS              | H <sub>2</sub> O      | 8              | 45        |
| 2                     | FeCl <sub>2</sub>                                          | TPPMS              | H <sub>2</sub> O      | 2              | 60        |
| 3                     | CuCl <sub>2</sub>                                          | TPPMS              | H <sub>2</sub> O      | 3              | 55        |
| 4                     | HCl                                                        | none               | H <sub>2</sub> O      | 7              | 54        |
| 5                     | ZnCl <sub>2</sub> , CoCl <sub>2</sub> or MnCl <sub>2</sub> | TPPMS              | H <sub>2</sub> O      | 0              | 0         |
| 6                     | none                                                       | none               | H <sub>2</sub> O      | 0              | 0         |
| <b>7</b>              | <b>NaAuCl<sub>4</sub>·2H<sub>2</sub>O</b>                  | <b>TPPMS</b>       | <b>H<sub>2</sub>O</b> | <b>87</b>      | <b>5</b>  |
| 8                     | AuBr <sub>3</sub>                                          | TPPMS              | H <sub>2</sub> O      | 79             | 11        |
| 9                     | HAuCl <sub>4</sub> ·4H <sub>2</sub> O                      | TPPMS              | H <sub>2</sub> O      | 79             | 18        |
| 10 <sup>b</sup>       | NH <sub>4</sub> AuCl <sub>4</sub>                          | TPPMS              | H <sub>2</sub> O      | 30             | 27        |
| 11                    | AuCl <sub>3</sub>                                          | TPPMS              | H <sub>2</sub> O      | 23             | 26        |
| 12                    | AuCl                                                       | TPPMS              | H <sub>2</sub> O      | 31             | 30        |
| 13                    | NaAuCl <sub>4</sub> ·2H <sub>2</sub> O                     | none               | H <sub>2</sub> O      | 0              | 34        |
| 14                    | NaAuCl <sub>4</sub> ·2H <sub>2</sub> O                     | TPPMS <sup>c</sup> | H <sub>2</sub> O      | 17             | 13        |
| 15                    | NaAuCl <sub>4</sub> ·2H <sub>2</sub> O                     | TPPTS <sup>d</sup> | H <sub>2</sub> O      | 0              | 54        |
| 16                    | NaAuCl <sub>4</sub> ·2H <sub>2</sub> O                     | TPPMS              | Toluene               | 20             | 43        |
| 17                    | NaAuCl <sub>4</sub> ·2H <sub>2</sub> O                     | TPPMS              | 1-Propanol            | 0              | 0         |
| 18                    | NaAuCl <sub>4</sub> ·2H <sub>2</sub> O                     | TPPMS              | DMF                   | 0              | 11        |
| 19                    | NaAuCl <sub>4</sub> ·2H <sub>2</sub> O                     | TPPMS              | DMF                   | 10             | 14        |
| <b>20<sup>d</sup></b> | <b>NaAuCl<sub>4</sub>·2H<sub>2</sub>O</b>                  | <b>TPPMS</b>       | <b>H<sub>2</sub>O</b> | <b>96</b>      | <b>4</b>  |

<sup>a</sup> **1a** (1 mmol), catalysts (5 mol%), ligand (10 mol%), **2a** (1.2 mmol), and solvent (4 mL) were used at 90 °C for 18 h. All the reactions were performed in a sealed tube under air. <sup>b</sup> 10 mol% was used. <sup>c</sup> 5 mol% was used. <sup>d</sup> P(C<sub>6</sub>H<sub>4</sub>-*m*-SO<sub>3</sub>Na)<sub>3</sub>. <sup>e</sup> at 100 °C.

**Scheme S2.** Hammett study.

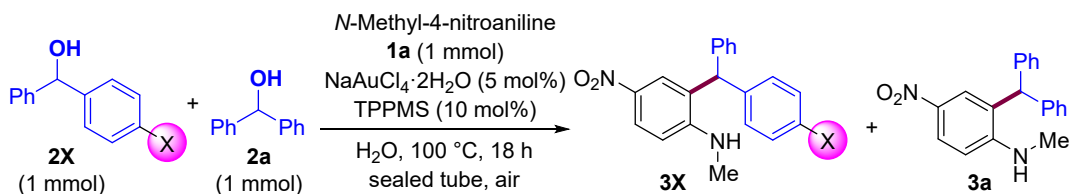

A mixture of *N*-methyl-4-nitroaniline **1a** (152.9 mg, 1.0 mmol), benzhydrol **2a** (184 mg, 1 mmol),  $\text{NaAuCl}_4 \cdot 2\text{H}_2\text{O}$  (5 mol%) and TPPMS (10 mol%) in water (4 mL) was heated at 100 °C for 18 h in a sealed tube under air. After the reaction mixture was cooled, 1,3,5-trimethoxybenzene (168 mg, 1 mmol, internal standard) was added to the reaction mixture, which was extracted with EtOAc. The organic layer was concentrated in vacuo. The residue was analyzed by  $^1\text{H-NMR}$  spectroscopy.

**Table S2.**

|     | sigma | $\log(k_X/k_H)$ |
|-----|-------|-----------------|
| OMe | -0.27 | 0.602           |
| Me  | -0.17 | 0.3505          |
| H   | 0     | 0               |
| F   | 0.06  | -0.237          |
| Cl  | 0.23  | -0.3631         |

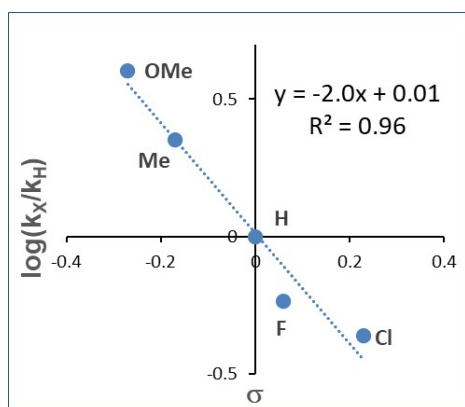

**Figure S1.** Hammett plot for the dehydrative Friedel–Crafts benzylation using 4-substituted benzhydrols

2.

**Scheme S3.** Reaction progress.

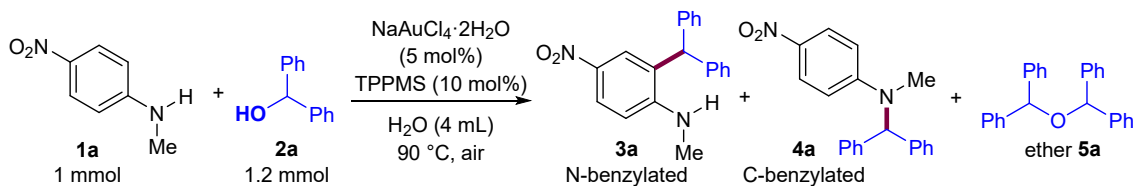

A mixture of *N*-methyl-4-nitroaniline **1a** (152.9 mg, 1.0 mmol), benzhydrol **2a** (184 mg, 1 mmol),  $\text{NaAuCl}_4 \cdot 2\text{H}_2\text{O}$  (5 mol%), TPPMS (10 mol%) and 1,3,5-trimethoxybenzene (168 mg, 1 mmol, internal standard) in water (4 mL) was heated at 90 °C in a sealed tube under air. Every hour, a few drops of the reaction mixture were transferred into a test tube. The sample was extracted with  $\text{CDCl}_3$ , which was analyzed by  $^1\text{H-NMR}$  spectroscopy.

**Table S3.** Reaction time course (conversion % or concentration M).

| Time (min) | C-benzyl <b>3a</b> (%) | N-benzyl <b>4a</b> (%) | Aniline <b>1a</b> (%) | Alcohol <b>2a</b> (M) | Dimer <b>5a</b> (M) |
|------------|------------------------|------------------------|-----------------------|-----------------------|---------------------|
| 0          | 0                      | 0                      | 100                   | 0.3                   | 0                   |
| 60         | 15                     | 32                     | 50                    | 0.045                 | 0.0575              |
| 80         | 18                     | 34                     | 48                    | 0.0425                | 0.06                |
| 120        | 27                     | 26                     | 45                    | 0.04                  | 0.0575              |
| 180        | 40                     | 23                     | 42                    | 0.0375                | 0.0575              |
| 240        | 48                     | 21                     | 36                    | 0.0375                | 0.0575              |
| 300        | 50                     | 19                     | 35                    | 0.035                 | 0.0475              |

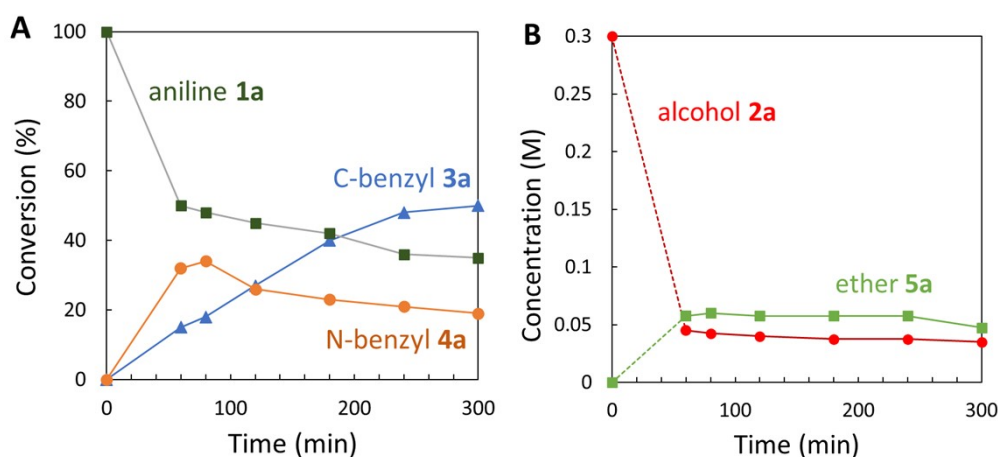

**Figure S2.** (A) and (B) The reaction profile for the dehydration coupling of aniline **1a** with alcohol **2a**.

**Table S4.** Reaction time course (Concentration M).

| Time (min) | C-benzyl <b>3a</b> | N-benzyl <b>4a</b> |
|------------|--------------------|--------------------|
| 0          | 0                  | 0                  |
| 60         | 0.0425             | 0.0775             |
| 80         | 0.0525             | 0.0825             |
| 120        | 0.07               | 0.075              |
| 180        | 0.0925             | 0.0575             |
| 240        | 0.1125             | 0.0525             |
| 300        | 0.1275             | 0.05               |

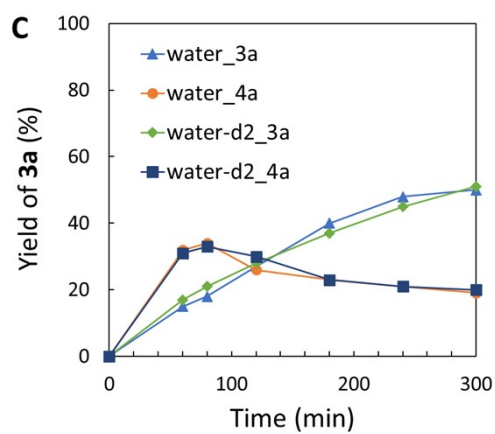

**Figure S3.** (C) The solvent isotope effect studies in H<sub>2</sub>O or in D<sub>2</sub>O.

### X-ray structure of **3a**.

Single crystal of **3a** was obtained by slow evaporation of toluene solution at room temperature as a colorless crystal. Single crystal was mounted on a loop for X-ray measurements. Diffraction data were collected on an X-ray diffractometer (Rigaku XtaLAB P200) equipped with a rotating anode X-ray source (Mo- $K\alpha$ ,  $\alpha = 0.71075$  Å) and a hybrid photon counting detector (PILATUS 200K) at 93 K. The frame data were integrated, and the absorption correction was calculated using the Rigaku CrystalClear, CrysAlisPro program package. The structures were solved by SHELXT Version 2018/2, and refined by full-matrix least-squares fitting on  $F^2$  (SHELXL Version 2018/3)<sup>1-2</sup>. All non-hydrogen atoms were refined anisotropically. All N–H hydrogen atoms were found by difference Fourier synthesis. The other hydrogens were located at the calculated positions. The crystal data and the structure refinements are summarized in Table S1. Crystallographic data have been deposited with the Cambridge Crystallographic Data Center as supplementary publication numbers CCDC 2358605. These data can be obtained free of charge from the Cambridge Crystallographic Data Center via [www.ccdc.cam.ac.uk/data\\_request/cif](http://www.ccdc.cam.ac.uk/data_request/cif).

**Table S5.** Crystallographic data and refinement parameters.

| Compound                              | <b>3a</b>                                                     |
|---------------------------------------|---------------------------------------------------------------|
| Formula                               | C <sub>20</sub> H <sub>18</sub> N <sub>2</sub> O <sub>2</sub> |
| $M_r$                                 | 318.36                                                        |
| Crystal system                        | monoclinic                                                    |
| Space group                           | $P2_1/c$                                                      |
| $a / \text{Å}$                        | 14.4437(5)                                                    |
| $b / \text{Å}$                        | 5.5419(2)                                                     |
| $c / \text{Å}$                        | 20.4328(6)                                                    |
| $\alpha / \text{deg}$                 | 90                                                            |
| $\beta / \text{deg}$                  | 95.219(3)                                                     |
| $\gamma / \text{deg}$                 | 90                                                            |
| $V / \text{Å}^3$                      | 1628.77(9)                                                    |
| $Z$                                   | 4                                                             |
| $Z'$                                  | 1                                                             |
| Temperature / $K$                     | 93.15                                                         |
| Goodness-of-fit on $F^2$              | 1.028                                                         |
| $R_1 [I > 2\sigma(I)]$ on $F$         | 0.0471                                                        |
| $wR_2$ (all data) on $F^2$            | 0.1124                                                        |
| Reflection collected (all data)       | 24796                                                         |
| No. of reflections $[I > 2\sigma(I)]$ | 2825                                                          |
| $R_{\text{int}}$                      | 0.0651                                                        |
| Abs. corr.                            | multi-scan                                                    |

|                      |                                                |
|----------------------|------------------------------------------------|
| Radiation type       | MoK $\alpha$ ( $\lambda = 0.71075\text{\AA}$ ) |
| $T_{\min}$           | 0.78362                                        |
| $T_{\max}$           | 1.00000                                        |
| $\theta_{\max}$      | 27.497                                         |
| $\mu/\text{mm}^{-1}$ | 0.085                                          |
| CCDC No.             | 2358605                                        |

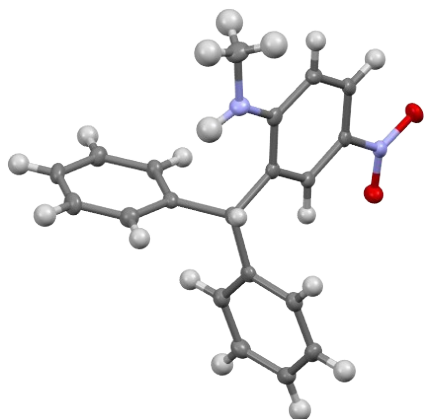

**Figure S4.** Crystal structure of the compound **3a**. The ORTEP drawings are shown with thermal ellipsoids at the 50% probability level.

#### References

1. G. M. Sheldrick, A short history of SHELX, *Acta Cryst.* **2008**, *A64*, 112–122. <https://doi.org/10.1107/S0108767307043930>.
2. G. M. Sheldrick, Crystal structure refinement with SHELXL, *Acta Cryst.* **2015**, *C71*, 3-8. <https://doi.org/10.1107/S2053229614024218>.

2-Benzhydryl-*N*-methyl-4-nitroaniline **3a**

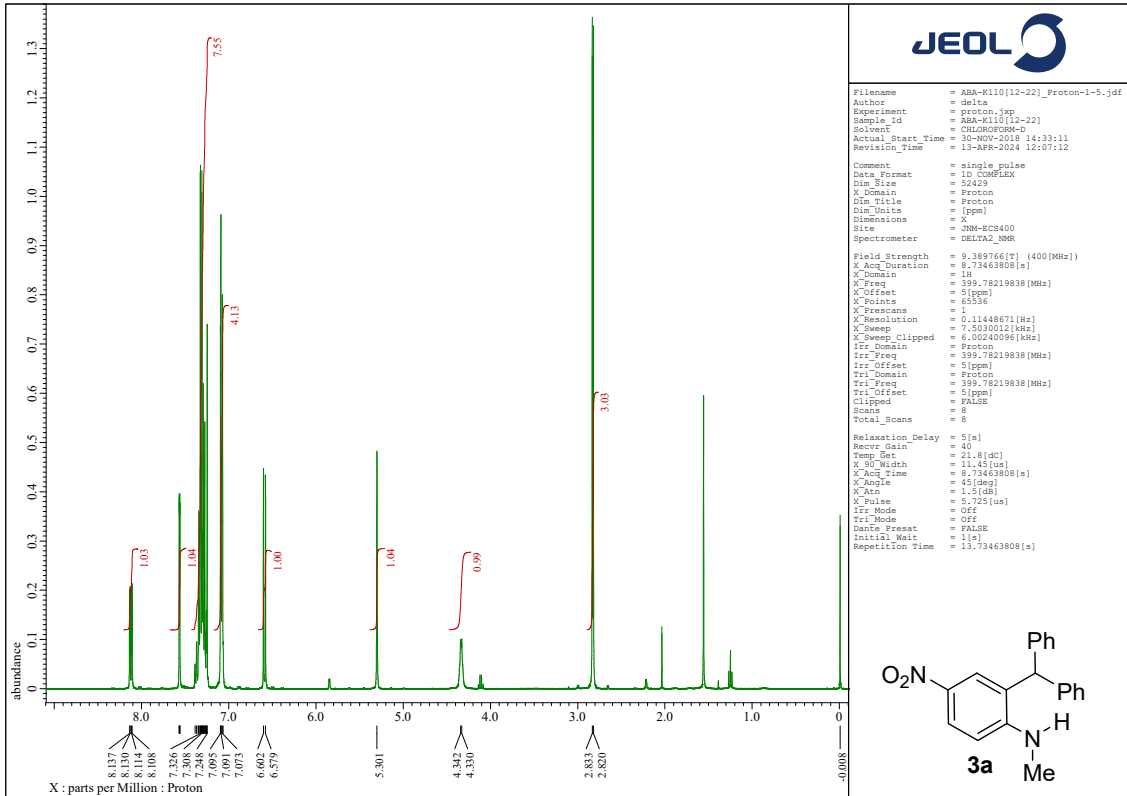

**JEOL**

```

Filename = ABA-K110[12-22]_Proton-1-5.jdf
Author = delta
Experiment = proton.jxp
Sample Id = ABA-K110[12-22]
Solvent = CDCl3CDCl3
Actual Start Time = 30-NOV-2018 14:33:11
Revision_Time = 13-APR-2024 12:07:12

Comment = single pulse
Data Format = 10 COMPLEX
Dim Size = 52429
X_Domain = Proton
Dim Title = Proton
Dim Units = [ppm]
Dimensions = X
Site = JNM-EC3400
Spectrometer = DELTA2_NMR

Field Strength = 9.389766[7] (400[MHz])
X_Acq_Duration = 8.73463808[s]
X_Domain = 1H
X_Freq = 399.78219838[MHz]
X_Offset = 5[ppm]
X_Points = 65536
X_Prescans = 1
X_Resolution = 0.11448671[Hz]
X_Sweep = 7.5030012[kHz]
X_Sweep_Clippped = 6.00240036[kHz]
Irr_Domain = Proton
Irr_Freq = 399.78219838[MHz]
Irr_Offset = 5[ppm]
Tri_Domain = Proton
Tri_Freq = 399.78219838[MHz]
Tri_Offset = 5[ppm]
Clipped = FALSE
Scans = 8
Total Scans = 8

Relaxation_Delay = 5[s]
Recvr_Gain = 40
Temp_Get = 21.8[dc]
X_90_Width = 11.45[us]
X_Acq_Time = 8.73463808[s]
X_Angle = 30[deg]
X_Att = 1.5[dB]
X_Pulse = 5.725[us]
Irr_Mode = Off
Tri_Mode = Off
Name_Preset = FALGE
Initial_Wait = 1[s]
Repetition_Time = 13.73463808[s]
    
```

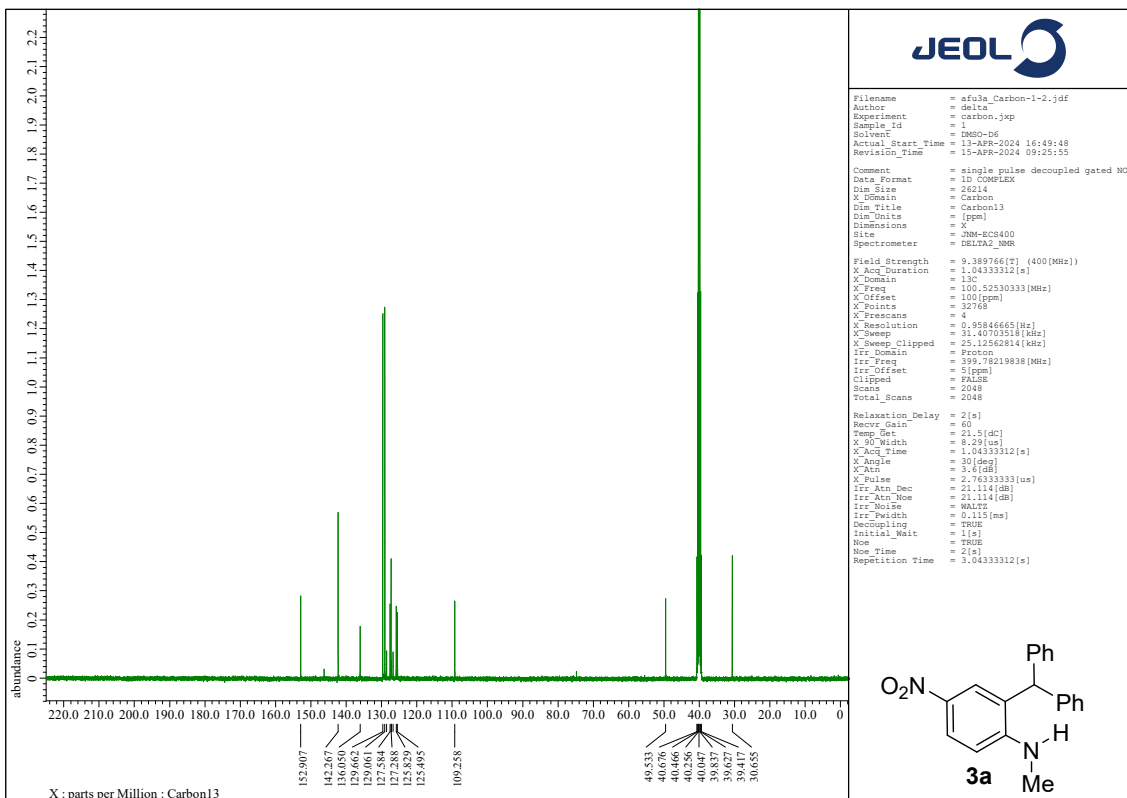

**JEOL**

```

Filename = aFu3a_Carbon-1-2.jdf
Author = delta
Experiment = carbon.jxp
Sample Id = 1
Solvent = DMSO-D6
Actual Start Time = 13-APR-2024 16:49:48
Revision_Time = 13-APR-2024 09:25:53

Comment = single pulse decoupled gated WC
Data Format = 10 COMPLEX
Dim Size = 26214
X_Domain = Carbon
Dim Title = Carbon13
Dim Units = [ppm]
Dimensions = X
Site = JNM-EC3400
Spectrometer = DELTA2_NMR

Field Strength = 9.389766[7] (400[MHz])
X_Acq_Duration = 1.04333312[s]
X_Domain = 13C
X_Freq = 100.52530333[MHz]
X_Offset = 100[ppm]
X_Points = 32768
X_Prescans = 4
X_Resolution = 0.95846665[Hz]
X_Sweep = 31.40705518[kHz]
X_Sweep_Clippped = 25.12568814[kHz]
Irr_Domain = Proton
Irr_Freq = 399.78219838[MHz]
Irr_Offset = 5[ppm]
Clipped = FALSE
Scans = 2048
Total Scans = 2048

Relaxation_Delay = 2[s]
Recvr_Gain = 60
Temp_Get = 21.5[dc]
X_90_Width = 9.29[us]
X_Acq_Time = 1.04333312[s]
X_Angle = 30[deg]
X_Att = 3.0[dB]
X_Pulse = 2.76333333[us]
Irr_Atr_Dec = 21.114[dB]
Irr_Atr_NoE = 21.114[dB]
Irr_Noise = WALTZ
Irr_Pwidth = 0.115[ms]
Decoupling = TRUO
Initial_Wait = 1[s]
Noe = TRUO
Noe_Time = 2[s]
Repetition_Time = 3.04333312[s]
    
```



N-Methyl-4-nitro-2-(phenylmethyl)aniline **3b**

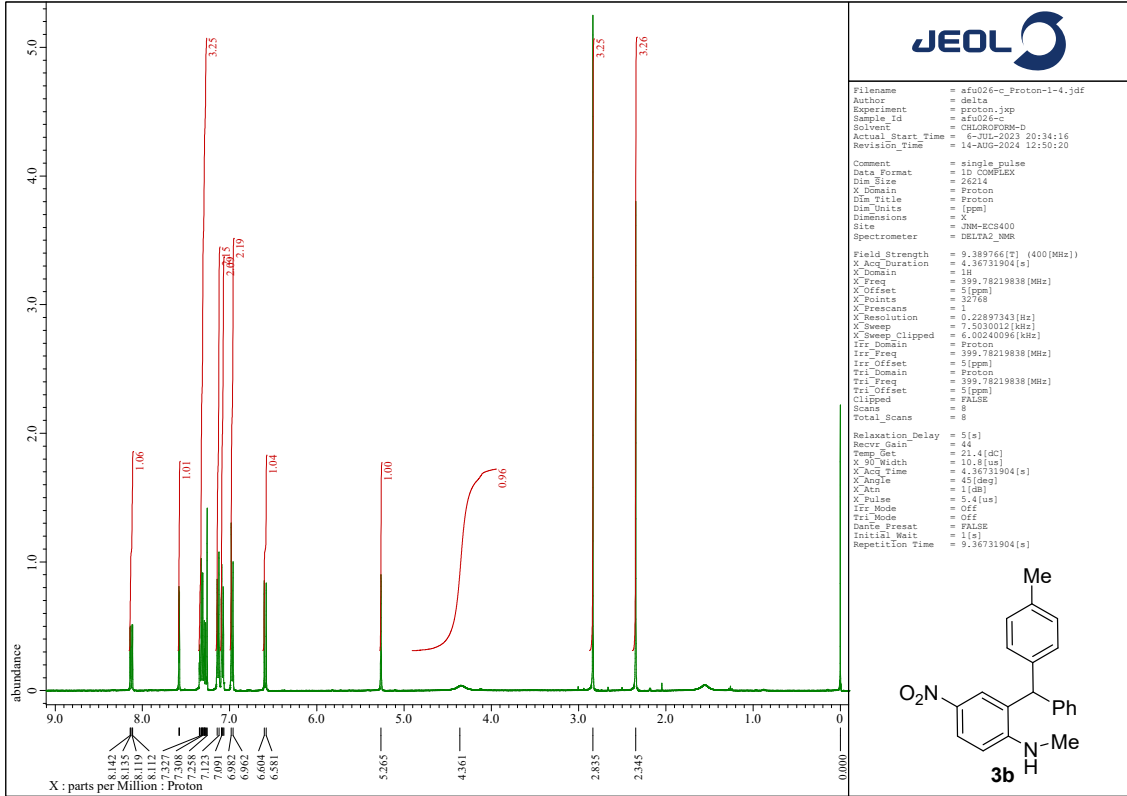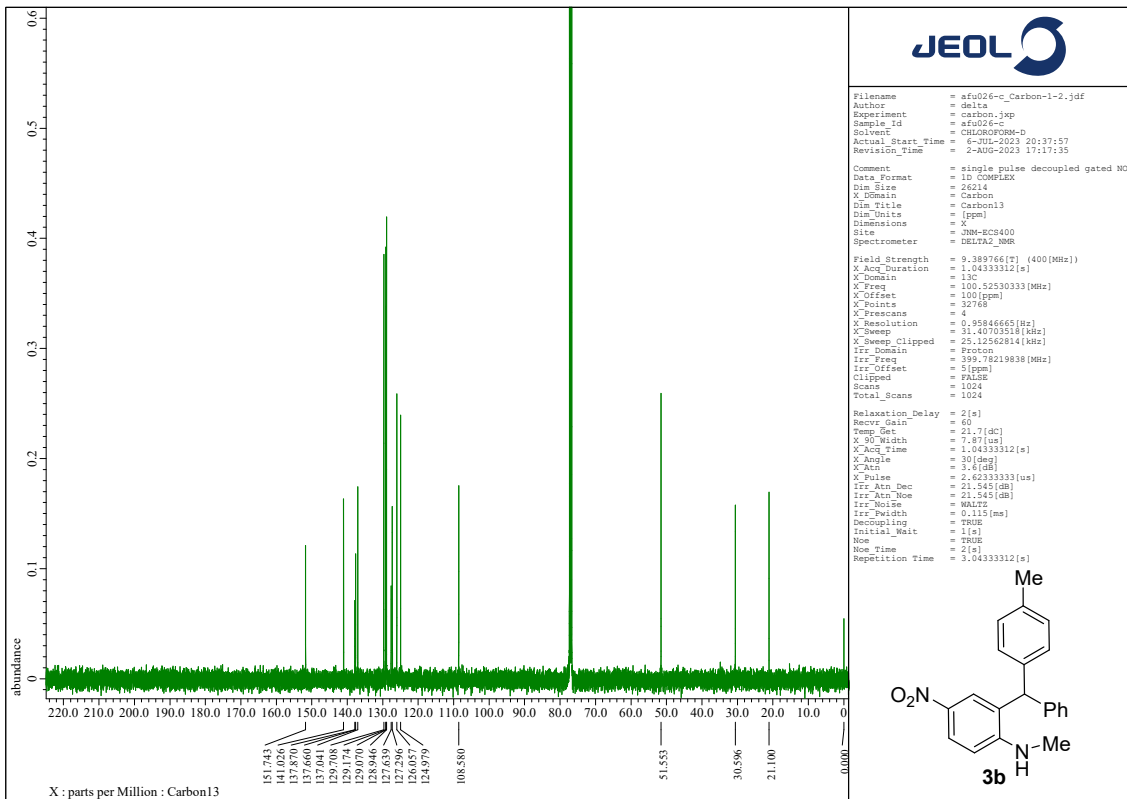

N-Methyl-4-nitro-2-(phenylmethyl)aniline **3c**

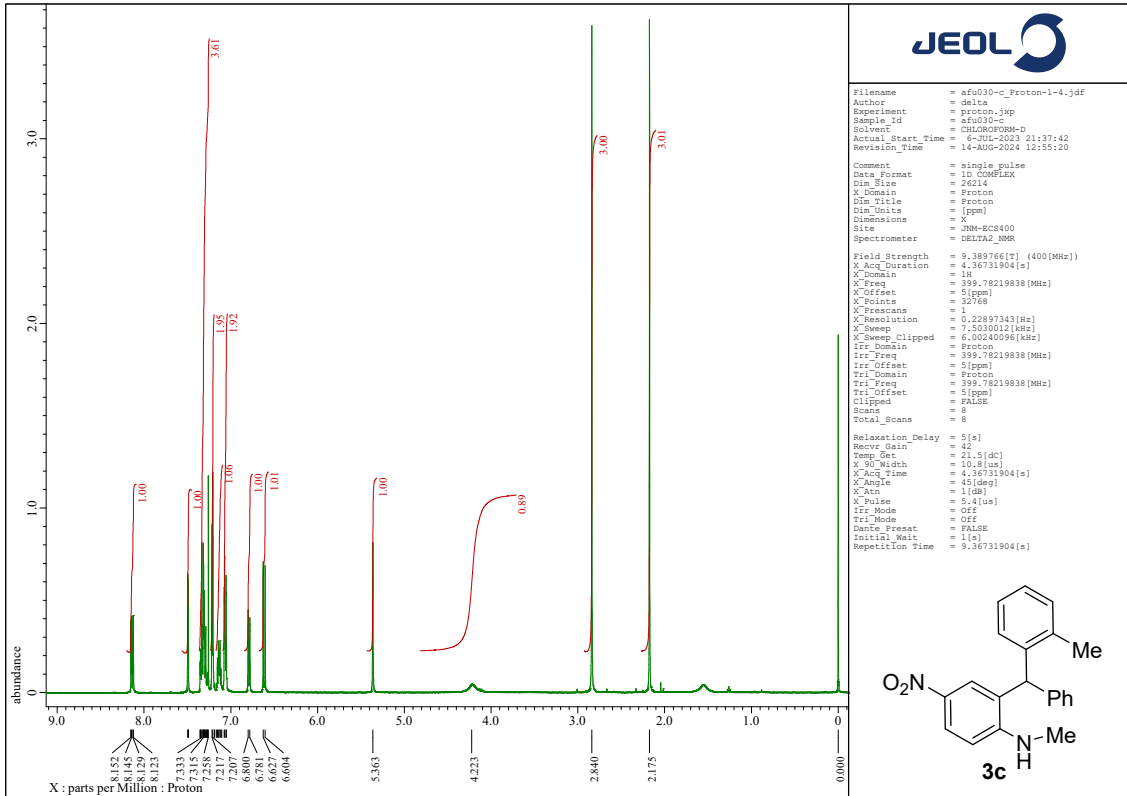

**JEOL**

```

Filename = afu030-e_Proton-1-4.jdf
Author = delta
Experiment = proton.jxp
Sample Id = afu030-e
Solvent = CDCl3CD3OH-D
Actual Start Time = 6-JUL-2023 21:37:42
Revision_Time = 14-AUG-2024 12:55:20

Comment = single pulse
Data Format = 1D COMPLEX
Dim Size = 26214
X_Domain = Proton
Dim Title = Proton
Dim Units = [ppm]
Dimensions = X
Site = JNM-ECX400
Spectrometer = DELTA2_NMR

Field Strength = 9.389766 [T] (400 [MHz])
X_Acq_Duration = 4.36731904 [s]
X_Domain = 1H
X_Freq = 399.78219838 [MHz]
X_Offset = 5 [ppm]
X_Points = 32768
X_Prescans = 1
X_Resolution = 0.22897343 [Hz]
X_Sweep = 7.5030012 [kHz]
X_Sweep_Clippped = 6.00240096 [kHz]
Irr_Domain = Proton
Irr_Freq = 399.78219838 [MHz]
Irr_Offset = 5 [ppm]
Tri_Domain = Proton
Tri_Freq = 399.78219838 [MHz]
Tri_Offset = 5 [ppm]
Clipped = FALSE
Scans = 8
Total Scans = 8

Relaxation_Delay = 5 [s]
Recvr_Gain = 41
Temp_Get = 21.5 [dc]
X_90_Width = 10.8 [us]
X_Acq_Time = 4.36731904 [s]
X_Angle = 30 [deg]
X_Pulse = 1 [dB]
X_Atn = 5.4 [us]
Irr_Mode = Off
Tri_Mode = Off
Date_Exec = 2023
Initial_Wait = 1 [s]
Repetition_Time = 9.36731904 [s]
    
```

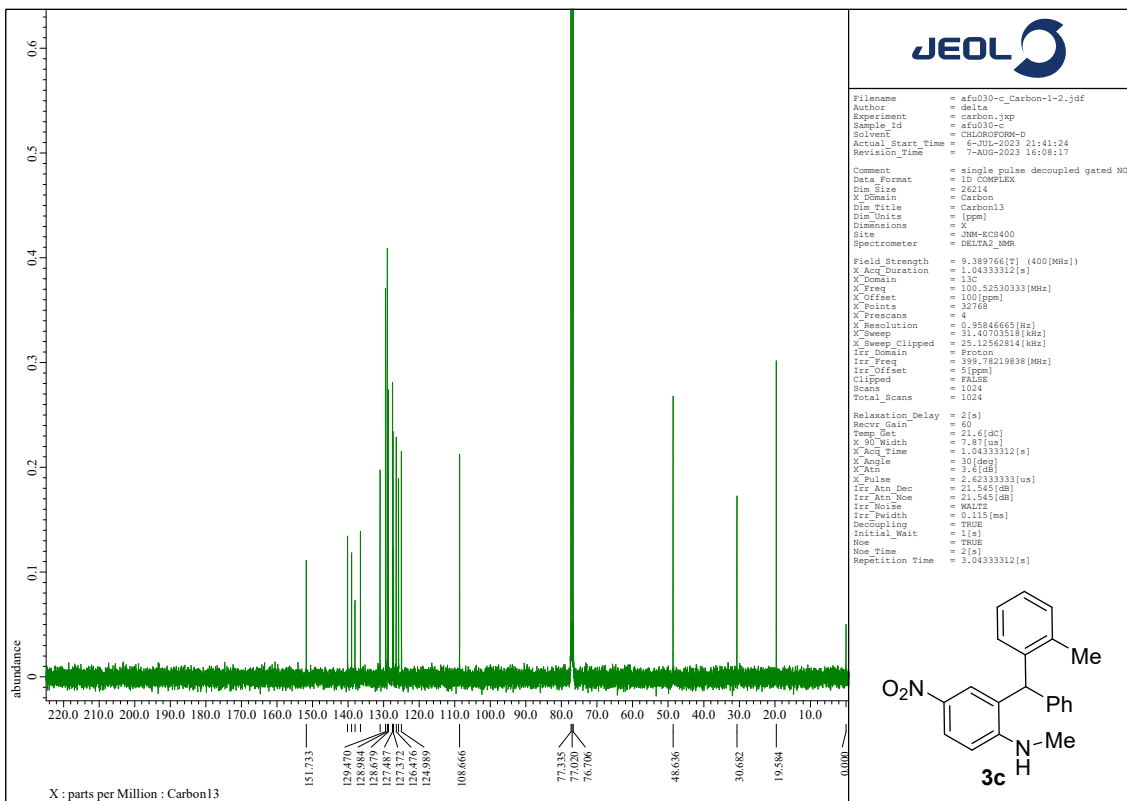

**JEOL**

```

Filename = afu030-e_Carbon-1-2.jdf
Author = delta
Experiment = carbon.jxp
Sample Id = afu030-e
Solvent = CDCl3CD3OH-D
Actual Start Time = 6-JUL-2023 21:41:24
Revision_Time = 7-AUG-2023 16:08:17

Comment = single pulse decoupled gated WC
Data Format = 1D COMPLEX
Dim Size = 26214
X_Domain = Carbon
Dim Title = Carbon13
Dim Units = [ppm]
Dimensions = X
Site = JNM-ECX400
Spectrometer = DELTA2_NMR

Field Strength = 9.389766 [T] (400 [MHz])
X_Acq_Duration = 1.04333312 [s]
X_Domain = 13C
X_Freq = 100.52530333 [MHz]
X_Offset = 100 [ppm]
X_Points = 32768
X_Prescans = 4
X_Resolution = 0.95846665 [Hz]
X_Sweep = 31.40705518 [kHz]
X_Sweep_Clippped = 25.12568814 [kHz]
Irr_Domain = Proton
Irr_Freq = 399.78219838 [MHz]
Irr_Offset = 5 [ppm]
Clipped = FALSE
Scans = 1024
Total Scans = 1024

Relaxation_Delay = 2 [s]
Recvr_Gain = 60
Temp_Get = 21.6 [dc]
X_90_Width = 7.87 [us]
X_Acq_Time = 1.04333312 [s]
X_Angle = 30 [deg]
X_Pulse = 2.62333333 [us]
Irr_Atn_Dec = 21.545 [dB]
Irr_Atn_Noie = 21.545 [dB]
Irr_Noie = MWIR
Irr_Pwidth = 0.115 [ms]
Decoupling = TRUE
Initial_Wait = 1 [s]
Noe = TRUE
Noe_Time = 2 [s]
Repetition_Time = 3.04333312 [s]
    
```

2-[(4-Methoxyphenyl)(phenyl)methyl]-*N*-methyl-4-nitroaniline **3d**

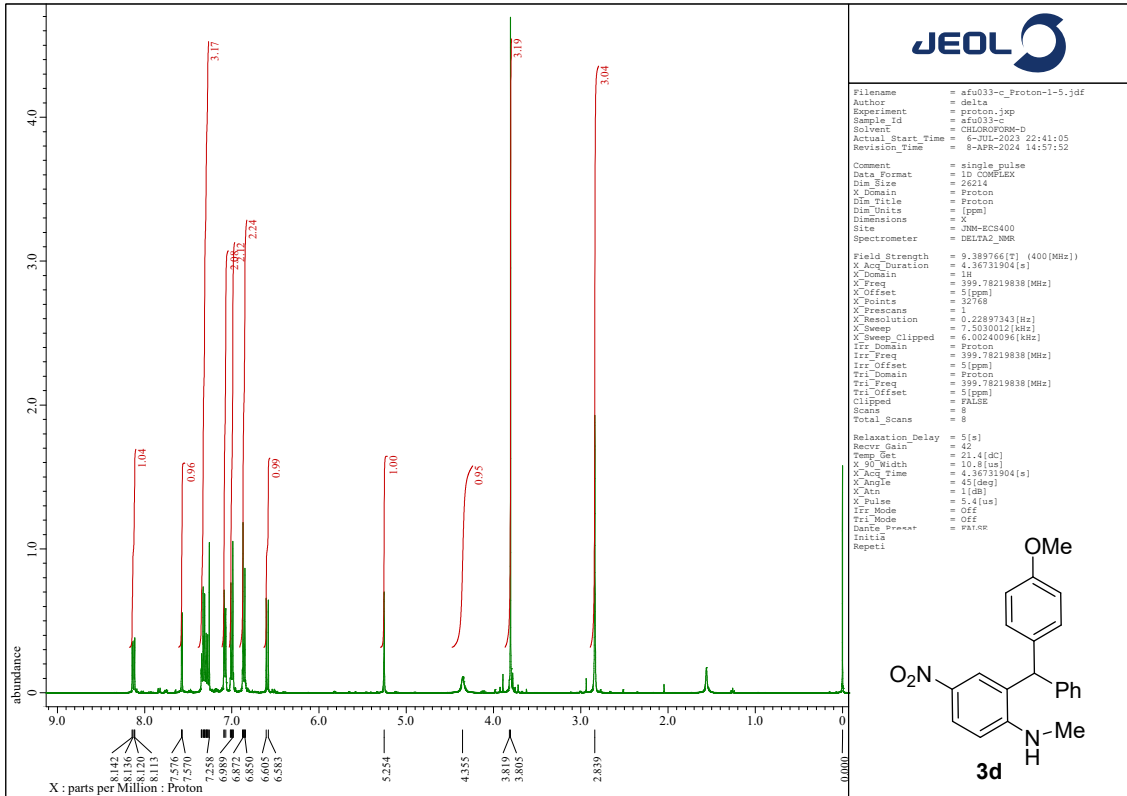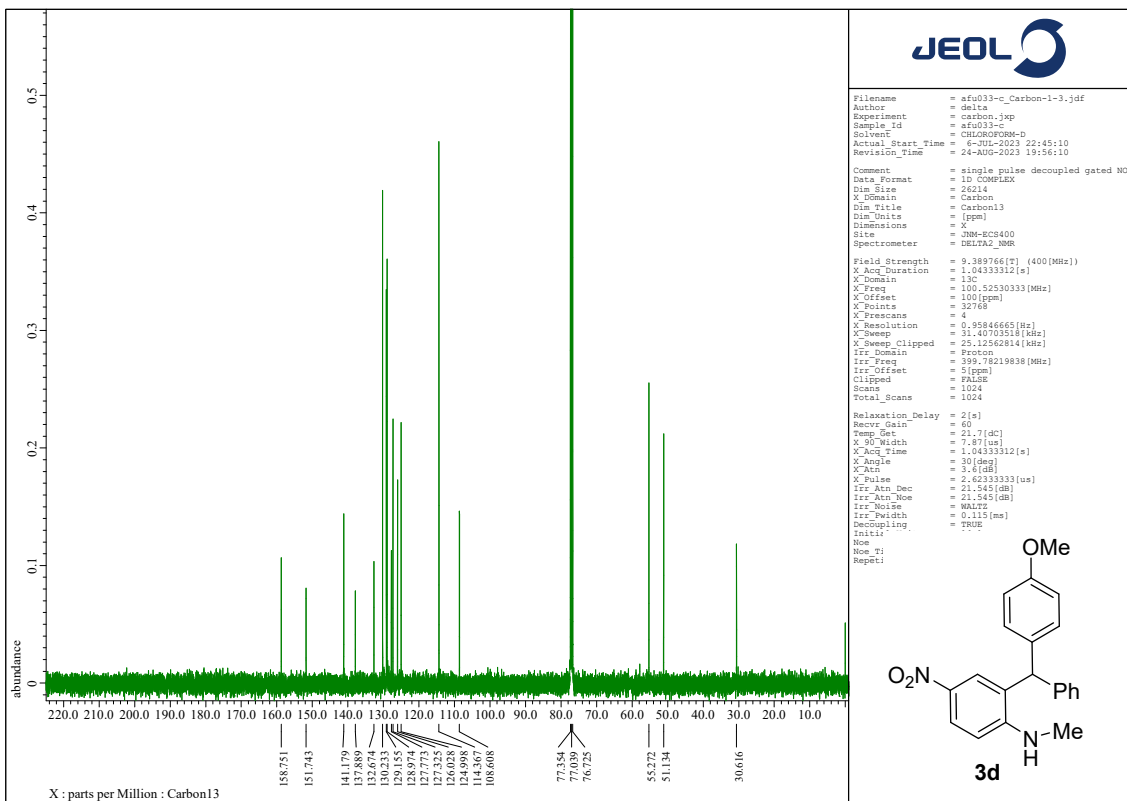

2-[(4-Chlorophenyl)(phenyl)methyl]-*N*-methyl-4-nitroaniline **3e**

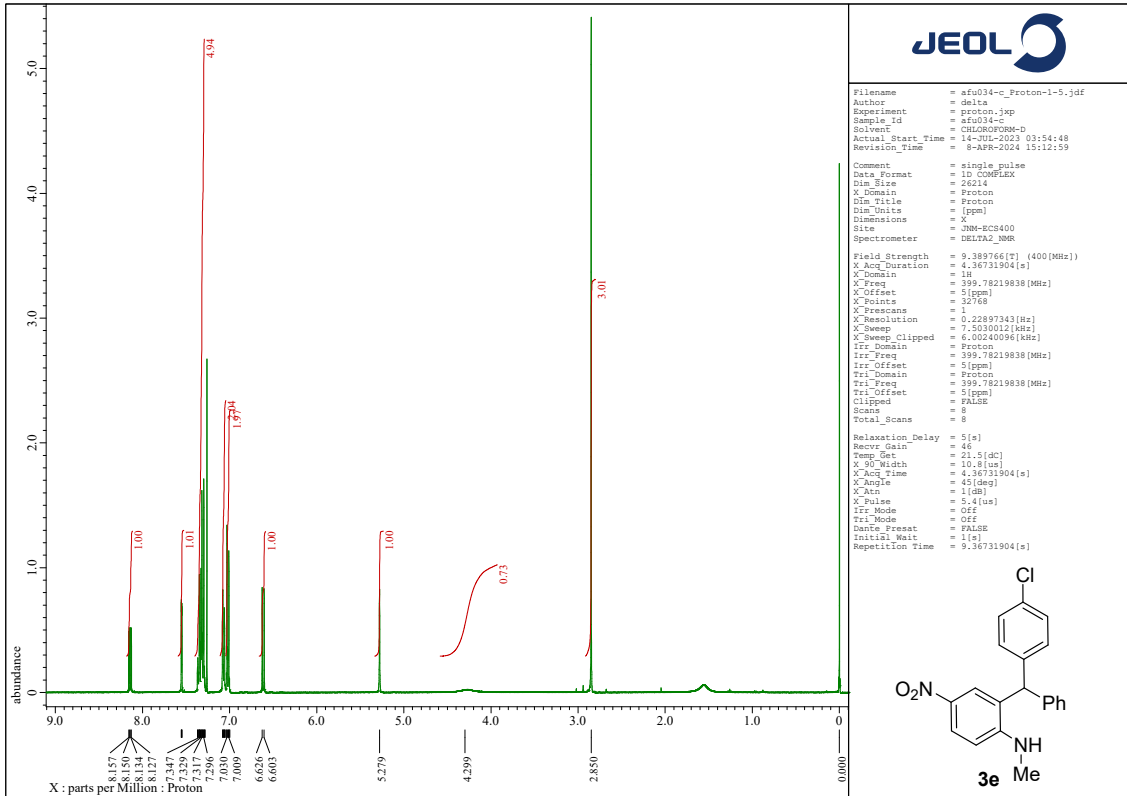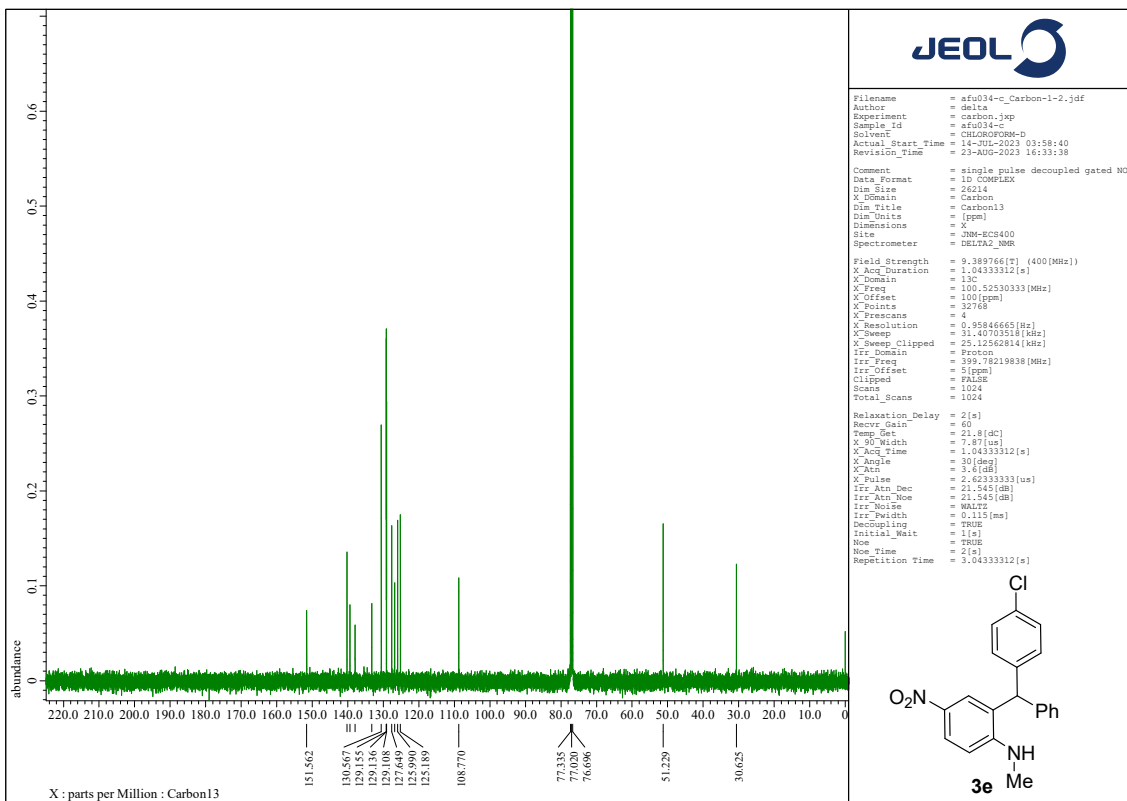

2-[Bis(4-methoxyphenyl)methyl]-*N*-methyl-4-nitroaniline **3f**

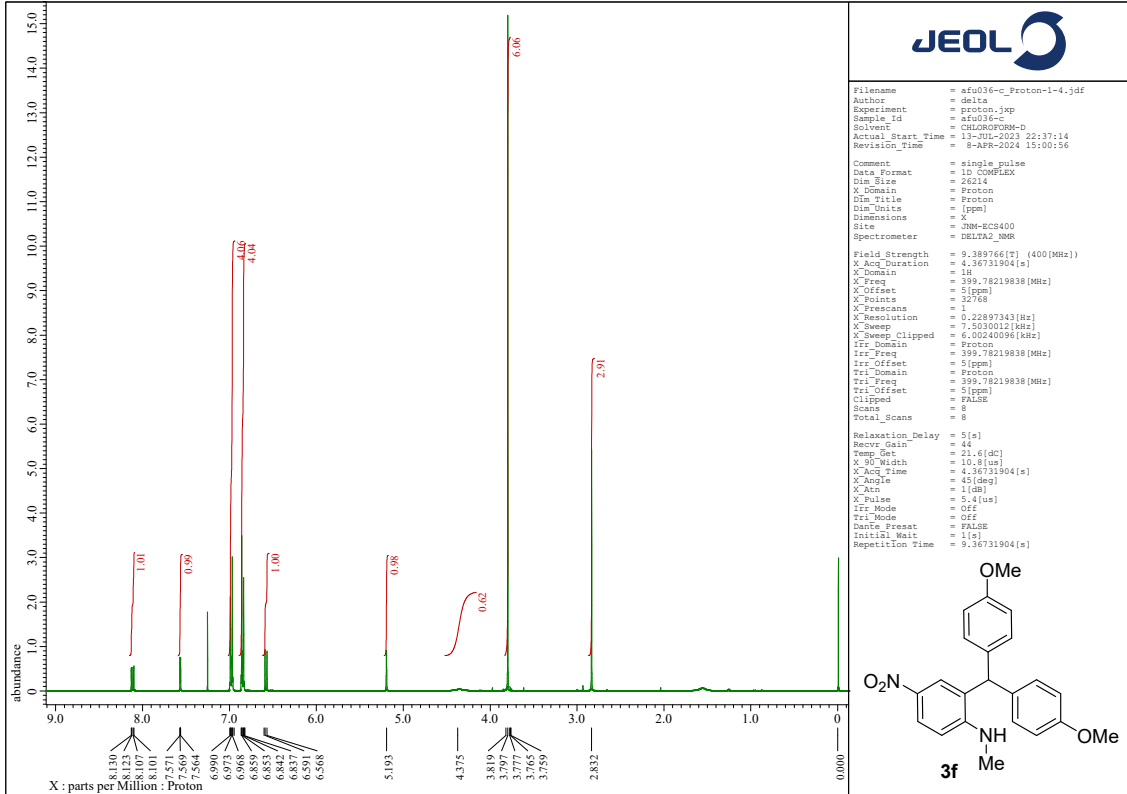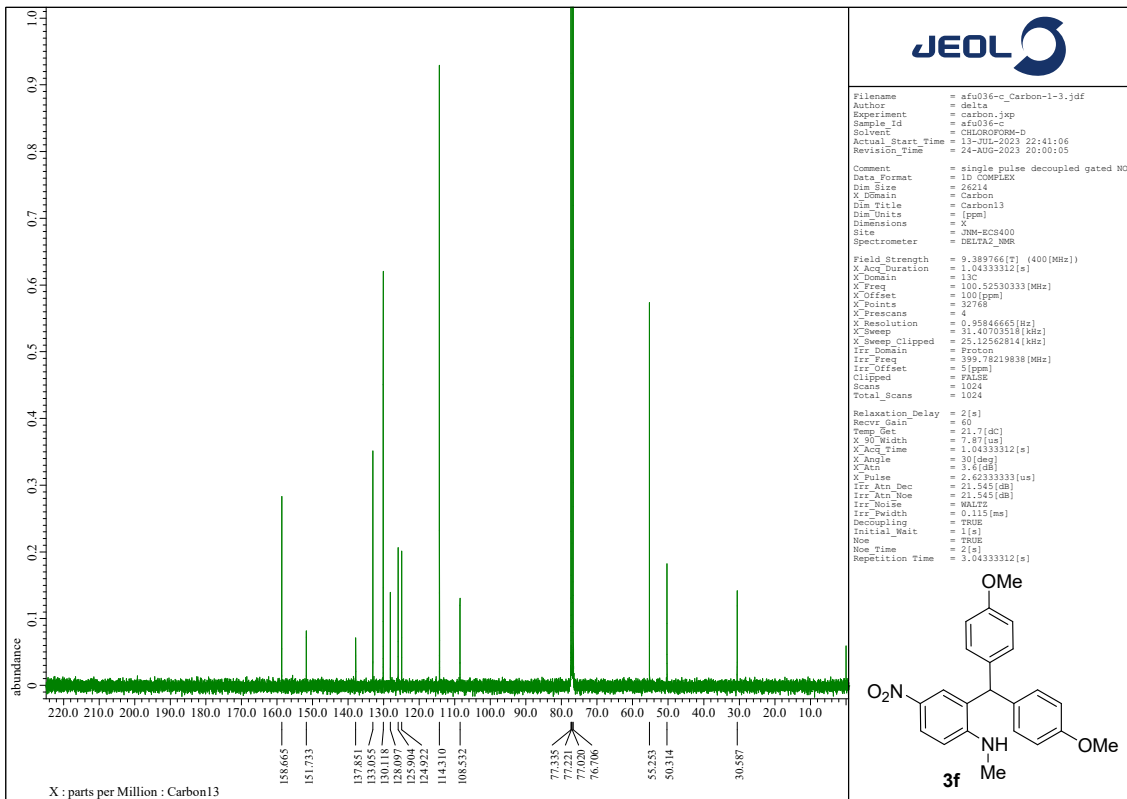

2-[Bis(4-fluorophenyl)methyl]-*N*-methyl-4-nitroaniline **3g**

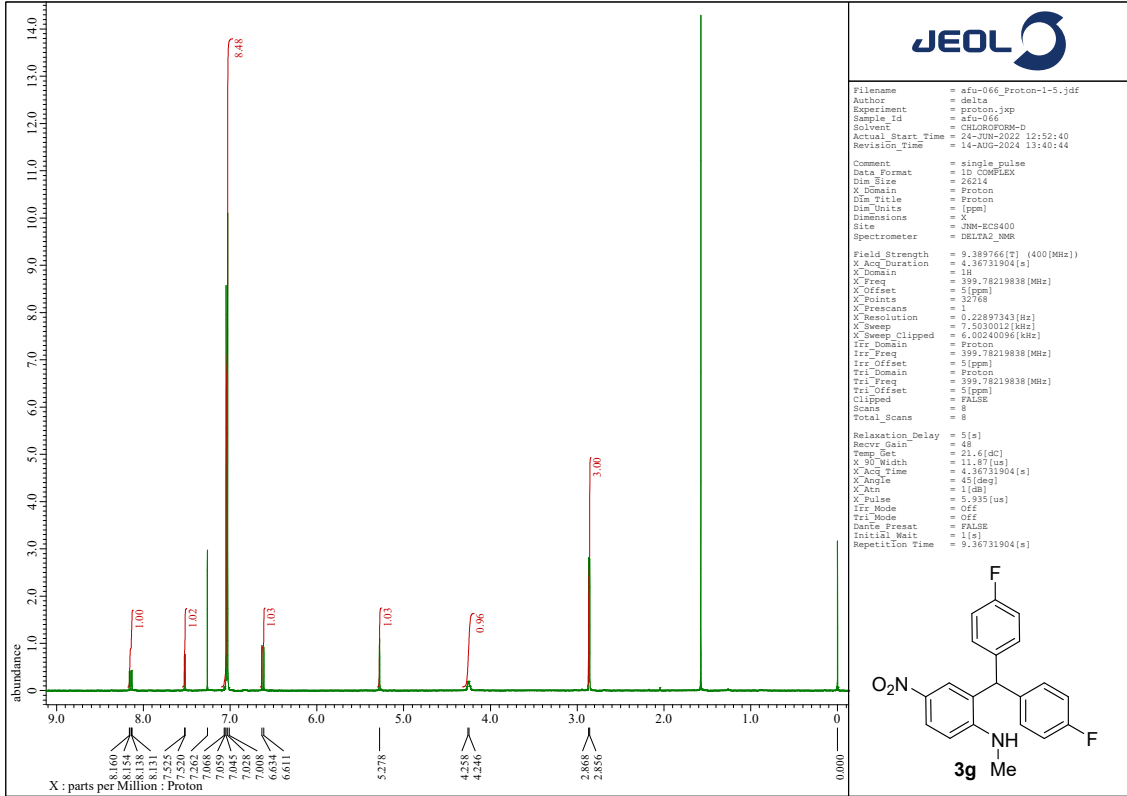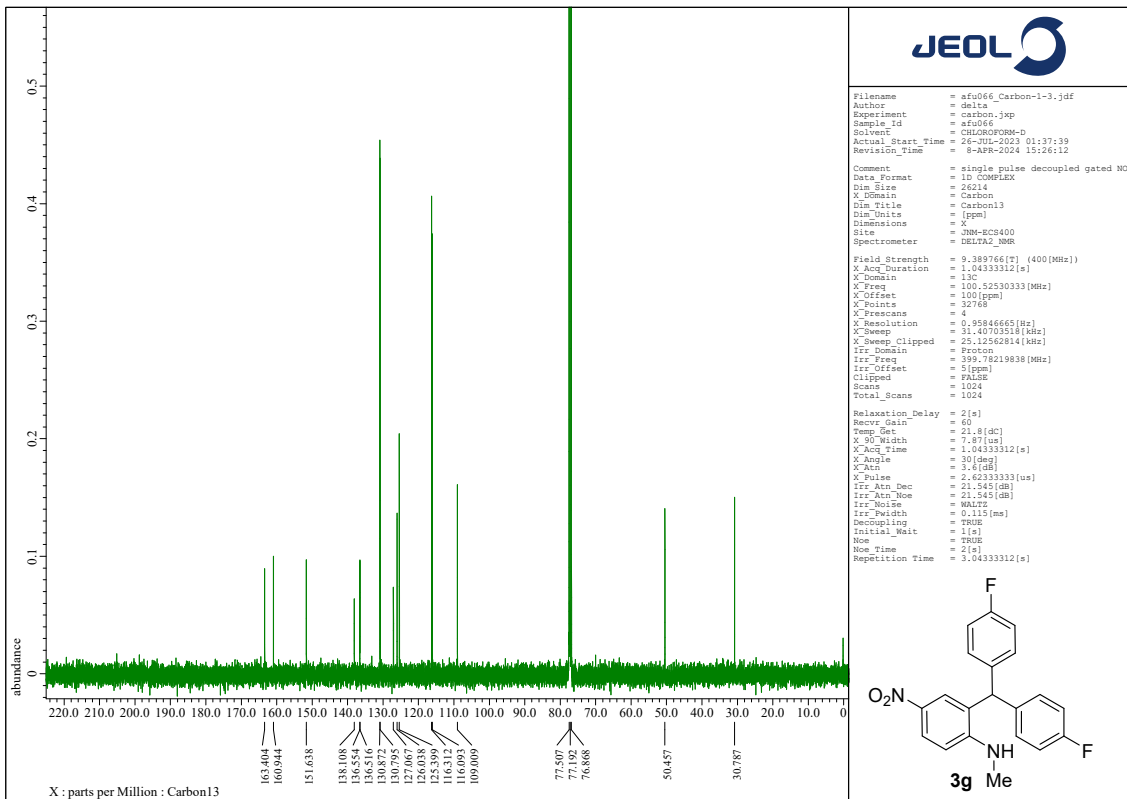

(E)-2-(1,3-Diphenylallyl)-N-methyl-4-nitroaniline **3h**

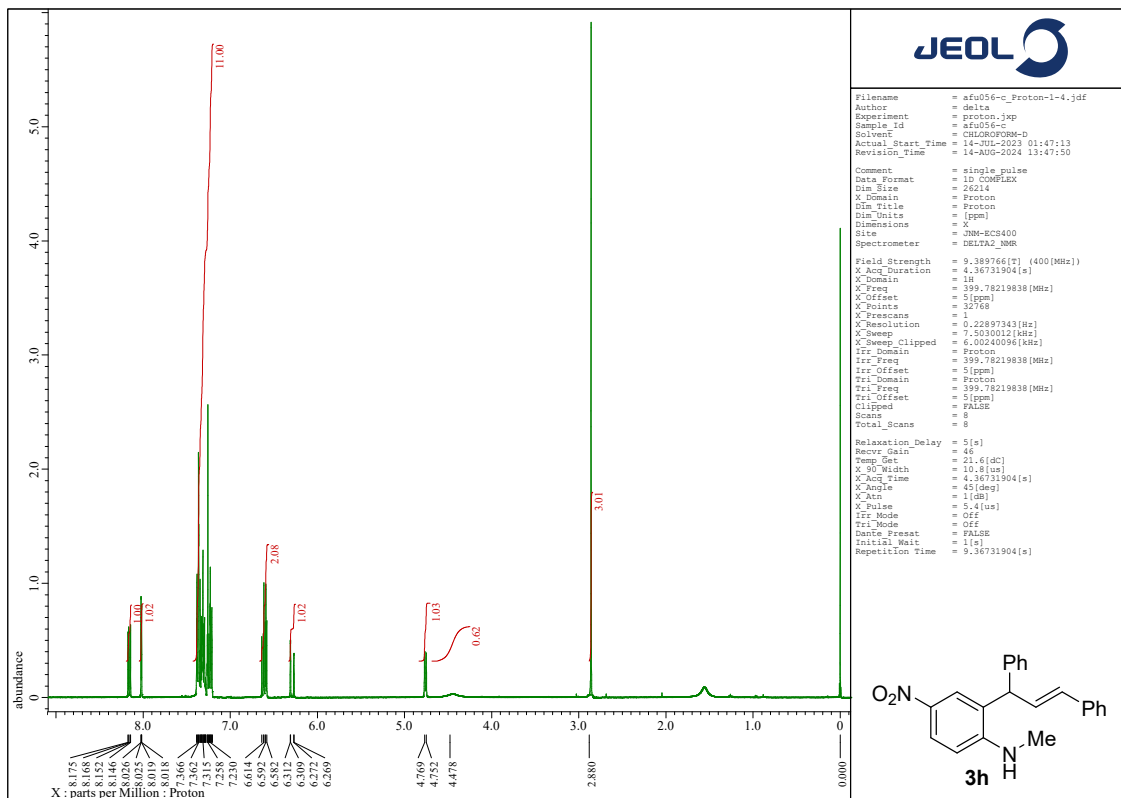

**JEOL**

Filename = afu056-e\_Proton-1-4.jdf  
 Author = delta  
 Experiment = proton.jxp  
 Sample Id = afu056-e  
 Solvent = CDCl3/CPDMS-D  
 Actual Start Time = 14-JUL-2023 01:47:13  
 Revision Time = 14-AUG-2024 13:47:50

Comment = single pulse  
 Data Format = 1D COMPLEX  
 Dim Size = 26214  
 X\_Domain = Proton  
 Dim Title = Proton  
 Dim Units = [ppm]  
 Dimensions = X  
 Site = JNM-ECX400  
 Spectrometer = DELTA2\_NMR

Field Strength = 9.389766 [T] (400 [MHz])  
 X\_Acq\_Duration = 4.36731904 [s]  
 X\_Domain = 1H  
 X\_Freq = 399.78219838 [MHz]  
 X\_Offset = 5 [ppm]  
 X\_Points = 32768  
 X\_Prescans = 1  
 X\_Resolution = 0.22897343 [Hz]  
 X\_Sweep = 7.5030012 [kHz]  
 X\_Sweep\_Clippped = 6.00240096 [kHz]  
 Iir\_Domain = Proton  
 Iir\_Freq = 399.78219838 [MHz]  
 Iir\_Offset = 5 [ppm]  
 Tri\_Domain = Proton  
 Tri\_Freq = 399.78219838 [MHz]  
 Tri\_Offset = 5 [ppm]  
 Clipped = FALSE  
 Scans = 8  
 Total Scans = 8

Relaxation Delay = 5 [s]  
 Recv\_Gain = 46  
 Temp\_Get = 21.6 [dc]  
 X\_90\_Width = 10.9 [us]  
 X\_Acq\_Time = 4.36731904 [s]  
 X\_Angle = 30 [deg]  
 X\_Pulse = 1 [dB]  
 X\_Mode = Off  
 Iir\_Mode = Off  
 Tri\_Mode = Off  
 Name\_Preset = F1A2E  
 Initial\_Wait = 1 [s]  
 Repetition Time = 9.36731904 [s]

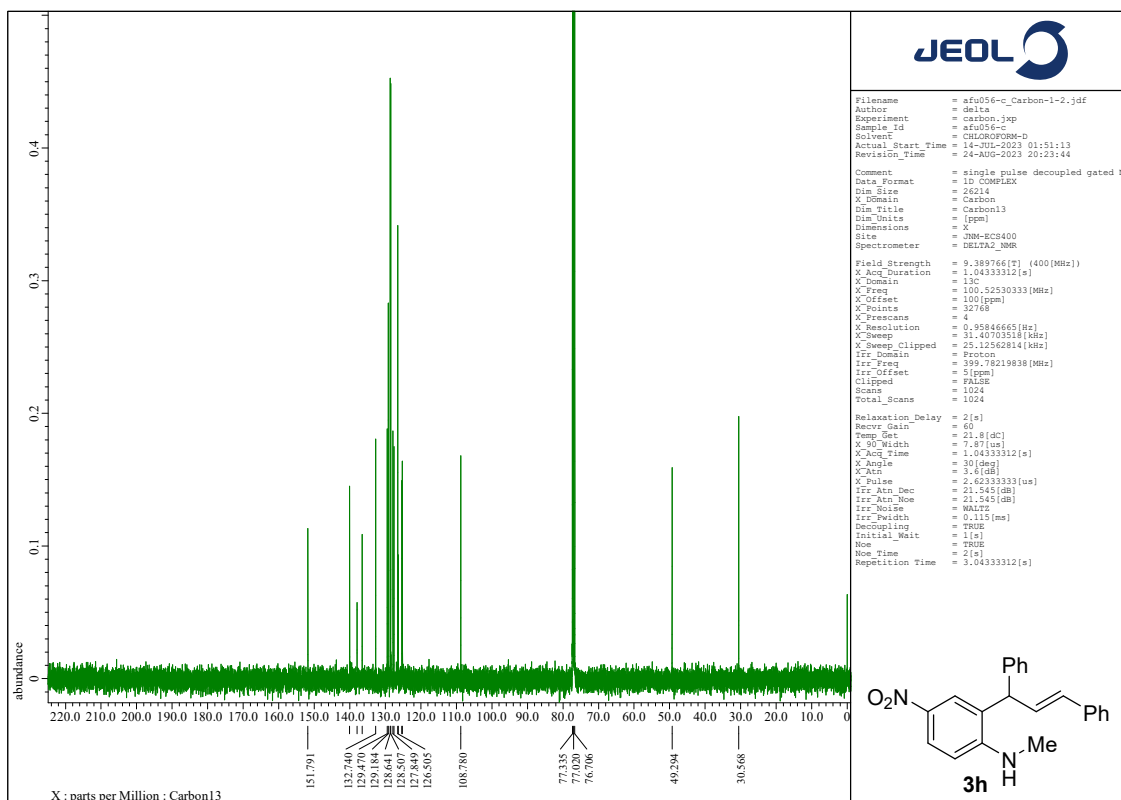

**JEOL**

Filename = afu056-e\_Carbon-1-2.jdf  
 Author = delta  
 Experiment = carbon.jxp  
 Sample Id = afu056-e  
 Solvent = CDCl3/CPDMS-D  
 Actual Start Time = 14-JUL-2023 01:51:13  
 Revision Time = 24-AUG-2023 20:23:44

Comment = single pulse decoupled gated WC  
 Data Format = 1D COMPLEX  
 Dim Size = 26214  
 X\_Domain = Carbon  
 Dim Title = Carbon13  
 Dim Units = [ppm]  
 Dimensions = X  
 Site = JNM-ECX400  
 Spectrometer = DELTA2\_NMR

Field Strength = 9.389766 [T] (400 [MHz])  
 X\_Acq\_Duration = 1.04333312 [s]  
 X\_Domain = 13C  
 X\_Freq = 100.52530333 [MHz]  
 X\_Offset = 100 [ppm]  
 X\_Points = 32768  
 X\_Prescans = 4  
 X\_Resolution = 0.95846665 [Hz]  
 X\_Sweep = 31.40705518 [kHz]  
 X\_Sweep\_Clippped = 25.12568814 [kHz]  
 Iir\_Domain = Proton  
 Iir\_Freq = 399.78219838 [MHz]  
 Iir\_Offset = 5 [ppm]  
 Clipped = FALSE  
 Scans = 1024  
 Total Scans = 1024

Relaxation Delay = 2 [s]  
 Recv\_Gain = 60  
 Temp\_Get = 21.8 [dc]  
 X\_90\_Width = 7.87 [us]  
 X\_Acq\_Time = 1.04333312 [s]  
 X\_Angle = 30 [deg]  
 X\_Pulse = 2.62333333 [us]  
 Iir\_Atr\_Dec = 21.845 [dB]  
 Iir\_Atr\_Noise = 21.545 [dB]  
 Iir\_Noise = WNR  
 Iir\_Pwidth = 0.115 [ms]  
 Decoupling = TRUW  
 Initial\_Wait = 1 [s]  
 Noe = TRUW  
 Noe Time = 2 [s]  
 Repetition Time = 3.04333312 [s]

3-Benzhydryl-4-(methylamino)benzonitrile **3i**

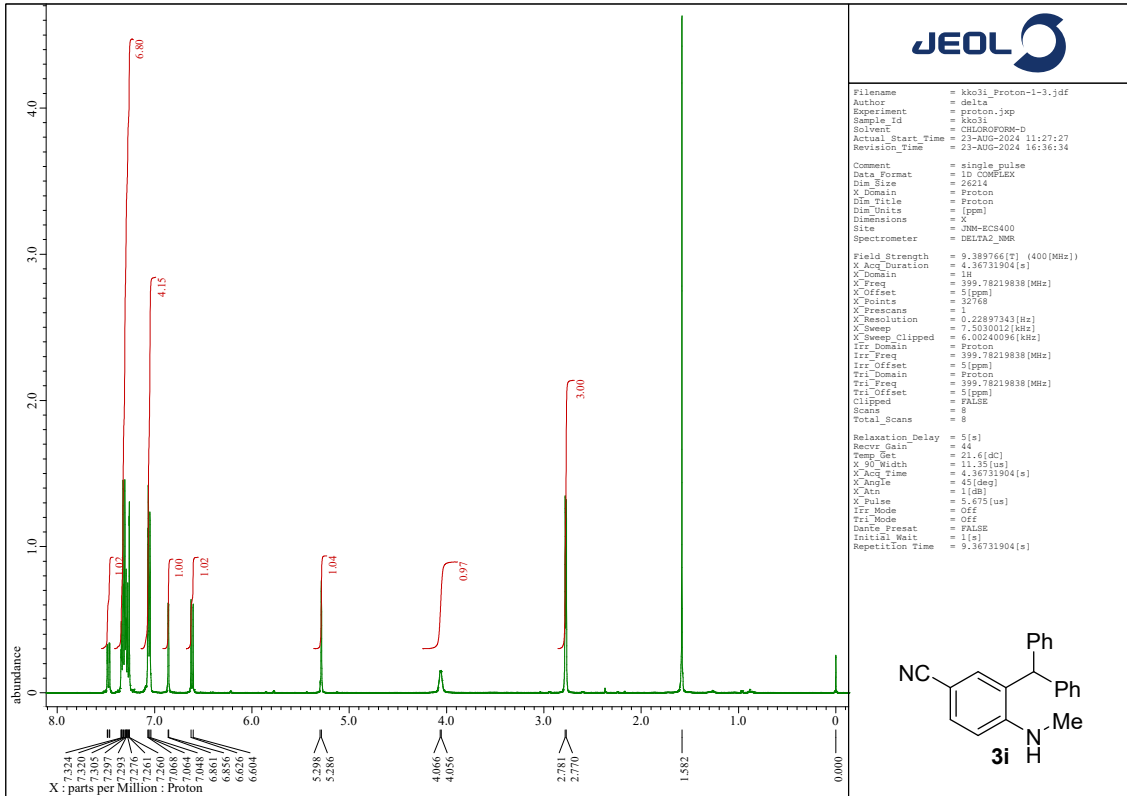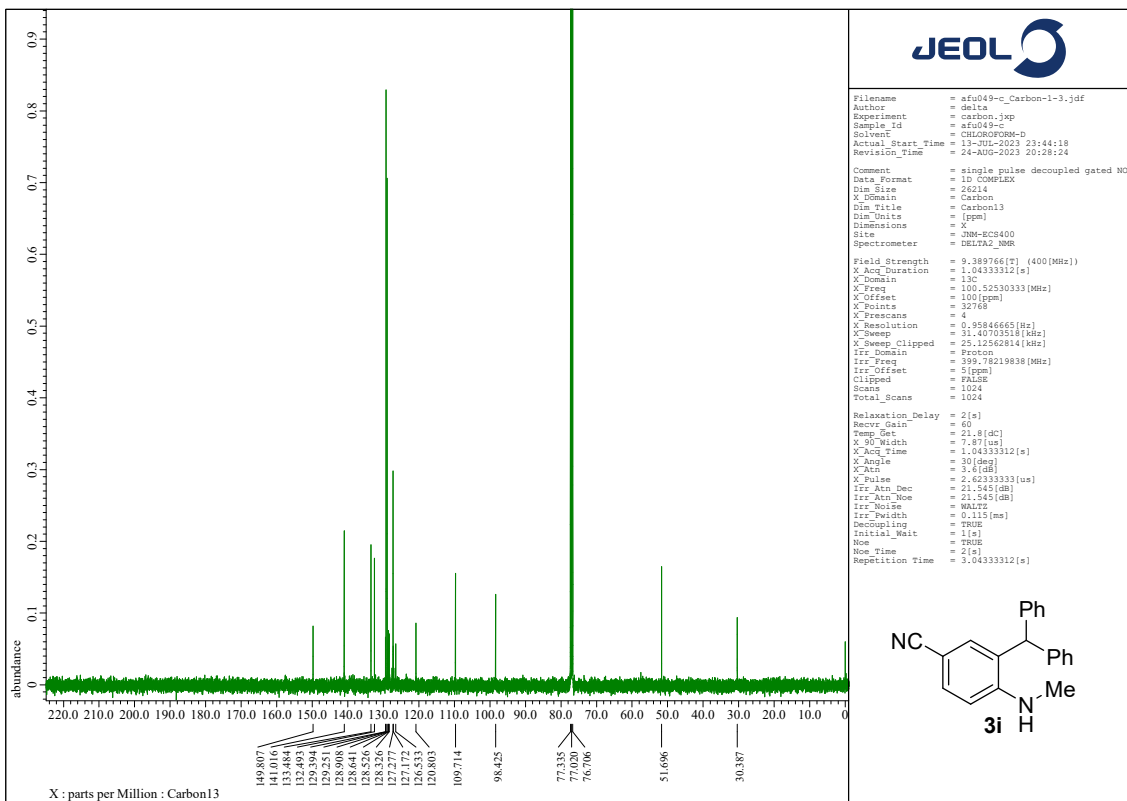



(E)-3-(1,3-Diphenylallyl)-4-(methylamino)benzoic acid **3j**

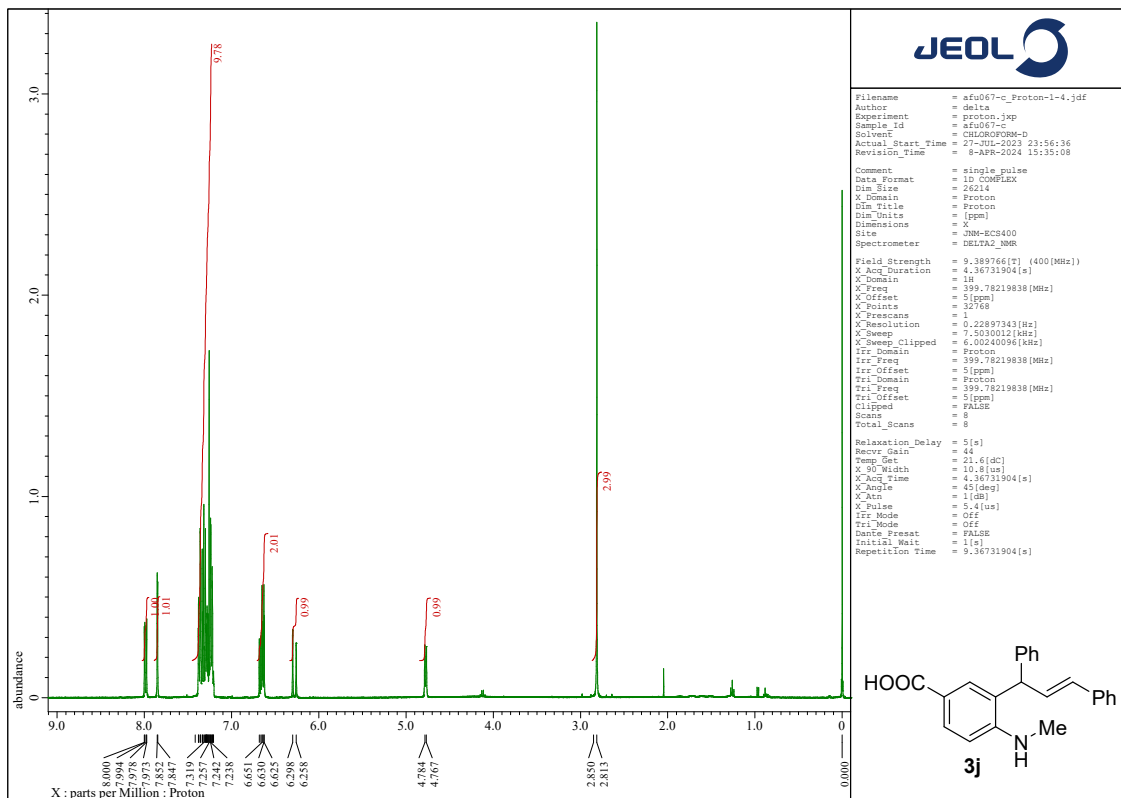

**JEOL**

Filename = afu067-e\_Proton-1-4.jdf  
Author = delta  
Experiment = proton.jxp  
Sample Id = afu067-e  
Solvent = CDCl3/CDCl3-D  
Actual Start Time = 27-JUL-2023 23:56:36  
Revision Time = 8-APR-2024 15:35:08

Comment = single pulse  
Data Format = 1D COMPLEX  
Dim Size = 26214  
X\_Domain = Proton  
Dim Title = Proton  
Dim Units = [ppm]  
Dimensions = X  
Site = JNM-ECX400  
Spectrometer = DELTA2\_NMR

Field Strength = 9.389766 [T] (400 [MHz])  
X\_Acq\_Duration = 4.36731904 [s]  
X\_Domain = 1H  
X\_Freq = 399.78219838 [MHz]  
X\_Offset = 5 [ppm]  
X\_Points = 32768  
X\_Prescans = 1  
X\_Resolution = 0.22897343 [Hz]  
X\_Sweep = 7.5030012 [kHz]  
X\_Sweep\_Clippped = 6.00240096 [kHz]  
Irr\_Domain = Proton  
Irr\_Freq = 399.78219838 [MHz]  
Irr\_Offset = 5 [ppm]  
Tri\_Domain = Proton  
Tri\_Freq = 399.78219838 [MHz]  
Tri\_Offset = 5 [ppm]  
Clipped = FALSE  
Scans = 8  
Total Scans = 8

Relaxation Delay = 5 [s]  
Recvr\_Gain = 44  
Temp\_Get = 21.6 [dc]  
X\_90\_Width = 10.9 [us]  
X\_Acq\_Time = 4.36731904 [s]  
X\_Angle = 30 [deg]  
X\_Att = 1 [dB]  
X\_Pulse = 5.4 [us]  
Irr\_Mode = Off  
Tri\_Mode = Off  
Change\_Preset = FALSE  
Initial\_Wait = 1 [s]  
Repetition Time = 9.36731904 [s]

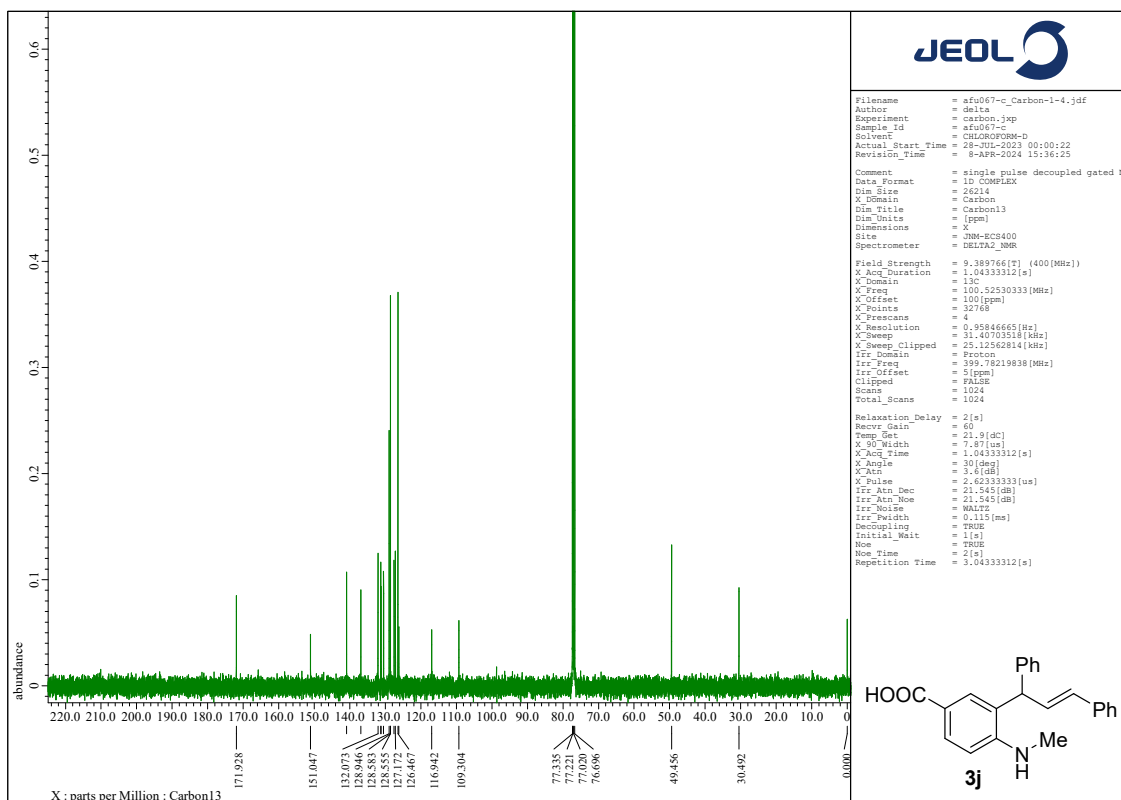

**JEOL**

Filename = afu067-e\_Carbon-1-4.jdf  
Author = delta  
Experiment = carbon.jxp  
Sample Id = afu067-e  
Solvent = CDCl3/CDCl3-D  
Actual Start Time = 28-JUL-2023 00:00:22  
Revision Time = 8-APR-2024 15:36:23

Comment = single pulse decoupled gated NO  
Data Format = 1D COMPLEX  
Dim Size = 26214  
X\_Domain = Carbon  
Dim Title = Carbon13  
Dim Units = [ppm]  
Dimensions = X  
Site = JNM-ECX400  
Spectrometer = DELTA2\_NMR

Field Strength = 9.389766 [T] (400 [MHz])  
X\_Acq\_Duration = 1.04333312 [s]  
X\_Domain = 13C  
X\_Freq = 100.52530333 [MHz]  
X\_Offset = 100 [ppm]  
X\_Points = 32768  
X\_Prescans = 4  
X\_Resolution = 0.95846665 [Hz]  
X\_Sweep = 31.40705518 [kHz]  
X\_Sweep\_Clippped = 25.12568814 [kHz]  
Irr\_Domain = Proton  
Irr\_Freq = 399.78219838 [MHz]  
Irr\_Offset = 5 [ppm]  
Clipped = FALSE  
Scans = 1024  
Total Scans = 1024

Relaxation Delay = 2 [s]  
Recvr\_Gain = 60  
Temp\_Get = 21.9 [dc]  
X\_90\_Width = 7.87 [us]  
X\_Acq\_Time = 1.04333312 [s]  
X\_Angle = 30 [deg]  
X\_Att = 3.0 [dB]  
X\_Pulse = 2.62333333 [us]  
Irr\_Atr\_Dec = 21.545 [dB]  
Irr\_Atr\_NoE = 21.545 [dB]  
Irr\_Noise = WALTZ  
Irr\_Pwidth = 0.115 [ms]  
Decoupling = TRUE  
Initial\_Wait = 1 [s]  
Noe = TRUE  
Noe Time = 2 [s]  
Repetition Time = 3.04333312 [s]

Methyl (E)-3-(1,3-diphenylallyl)-4-(methylamino)benzoate 3k

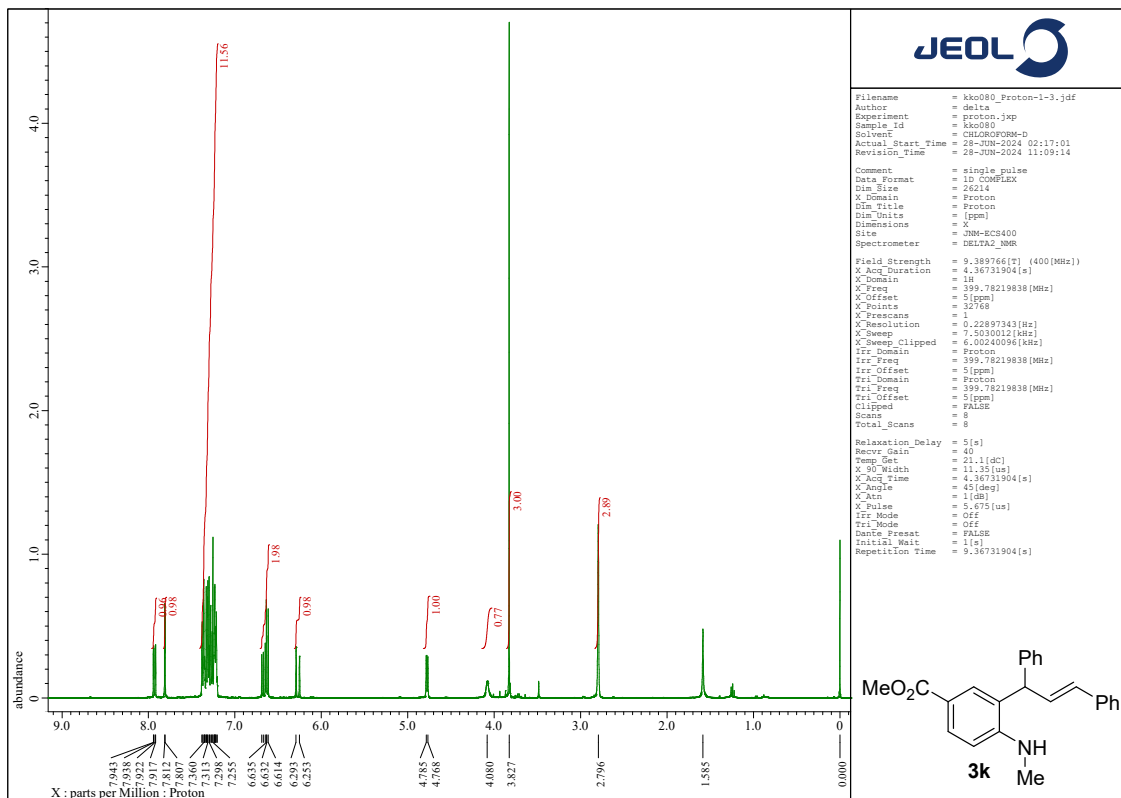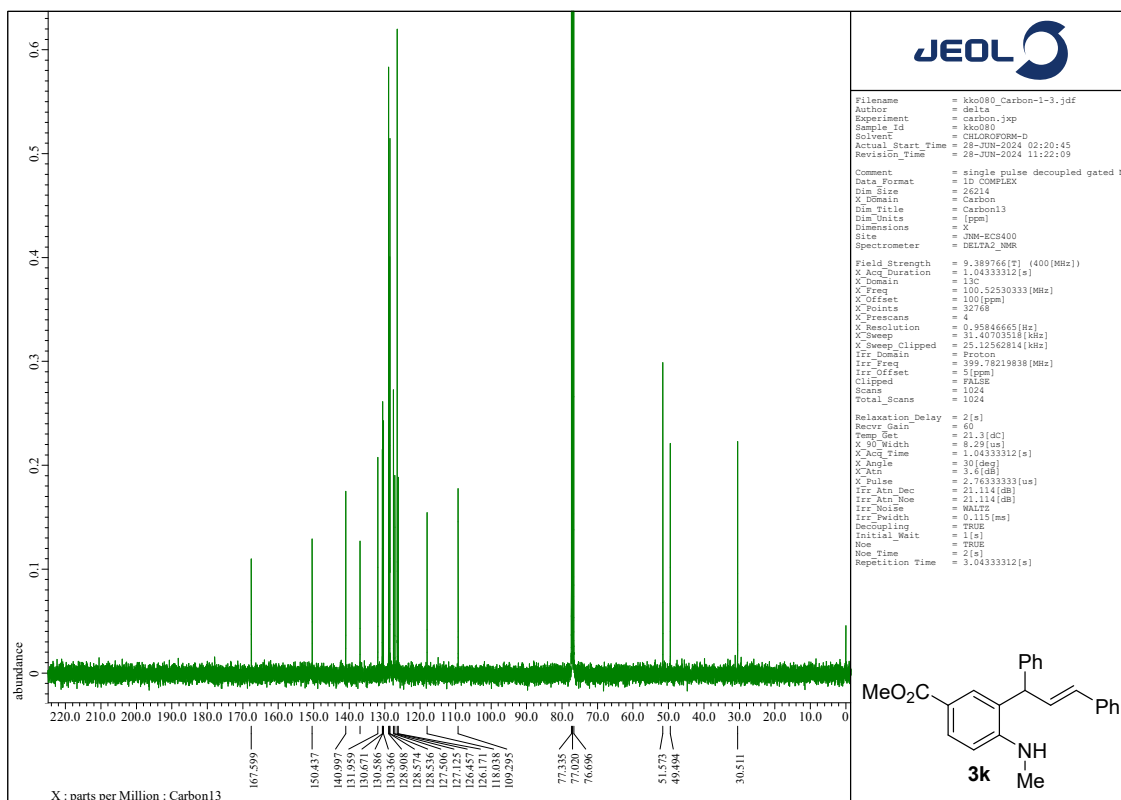

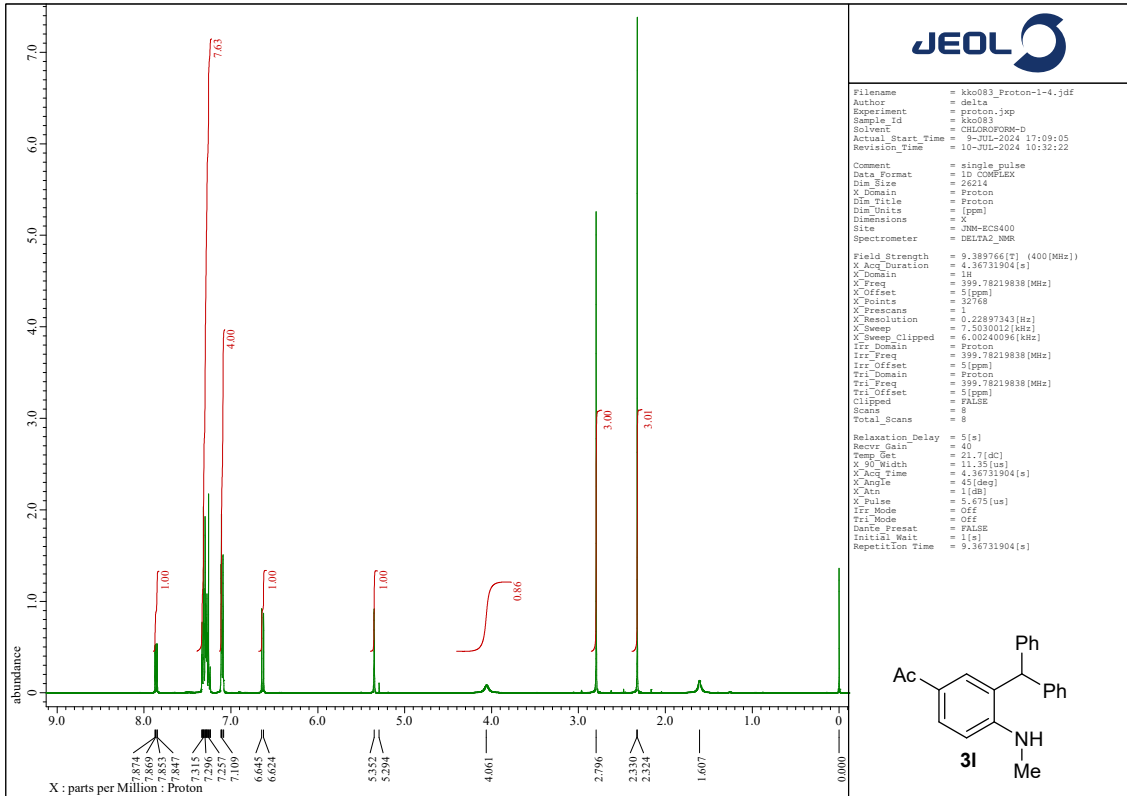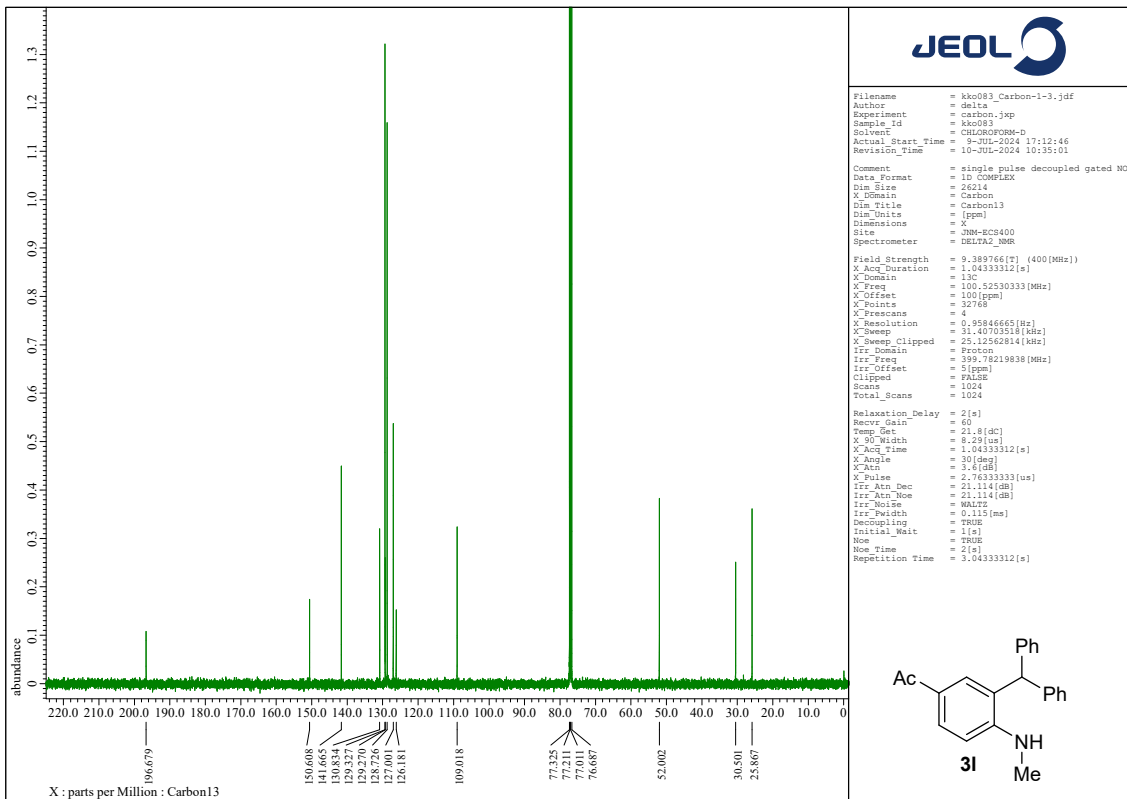

2-Benzhydryl-N-ethyl-4-nitroaniline **3m**

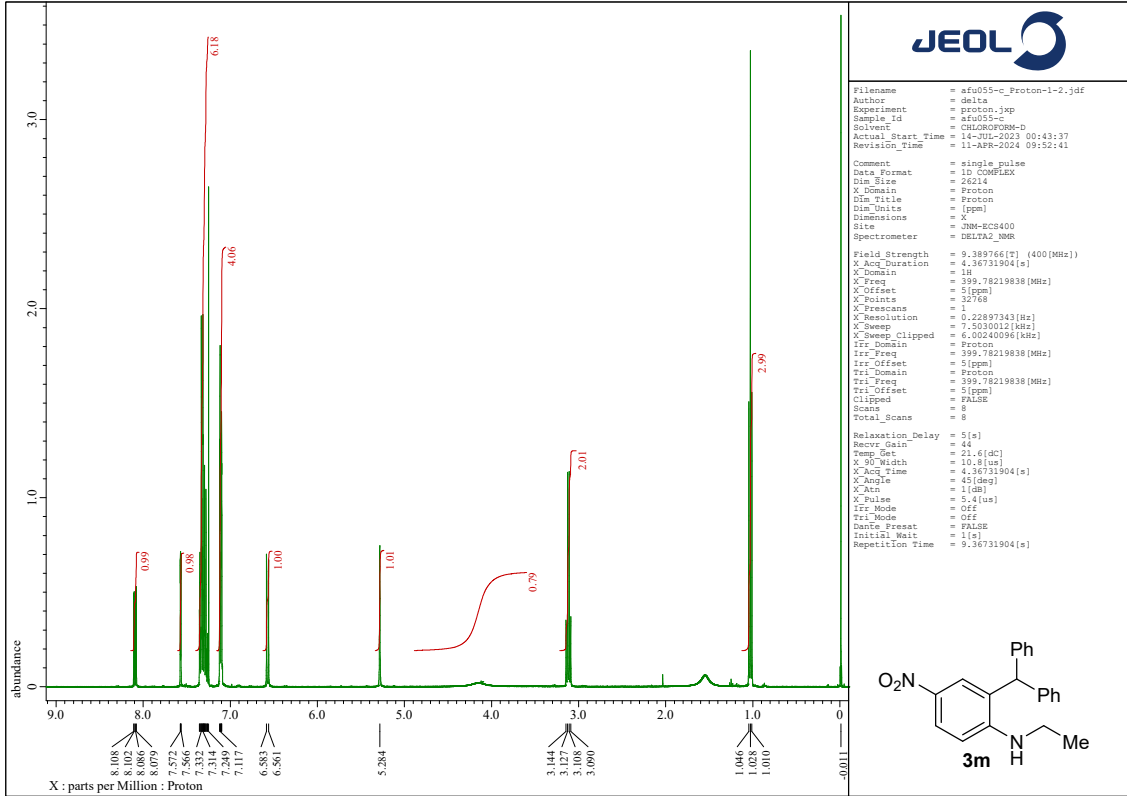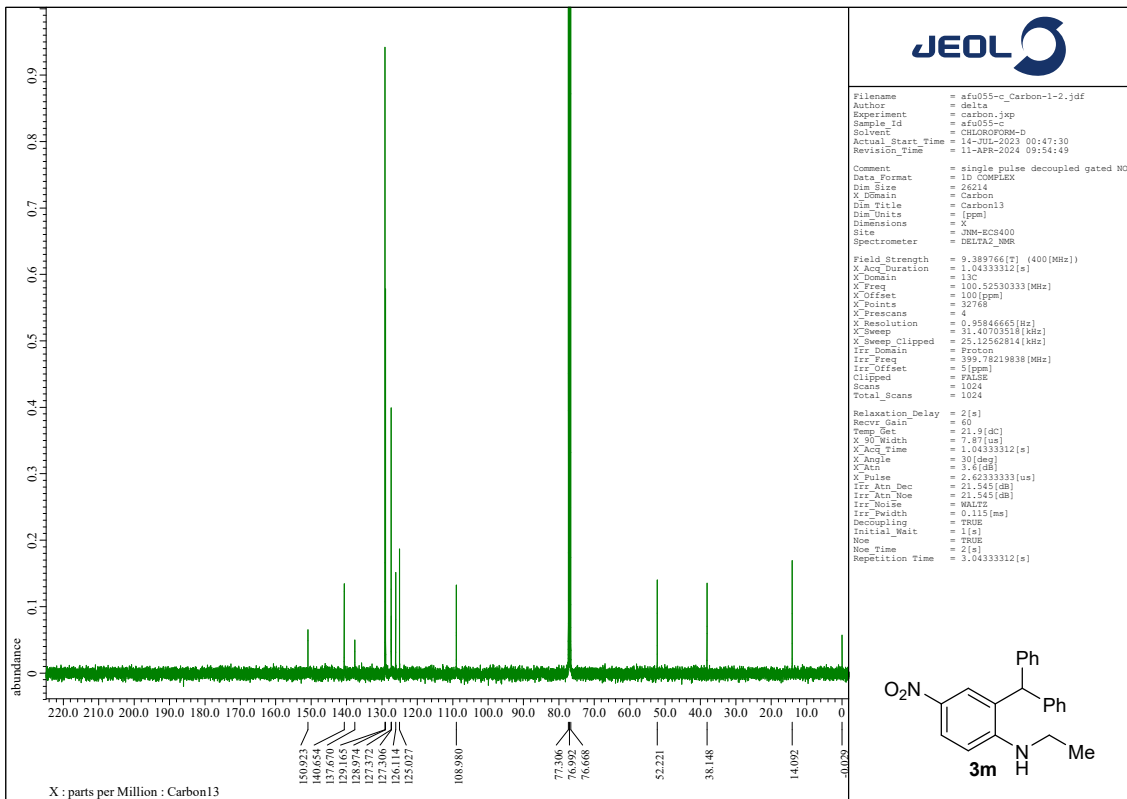

2-Benzhydryl-*N*-butyl-4-nitroaniline **3n**

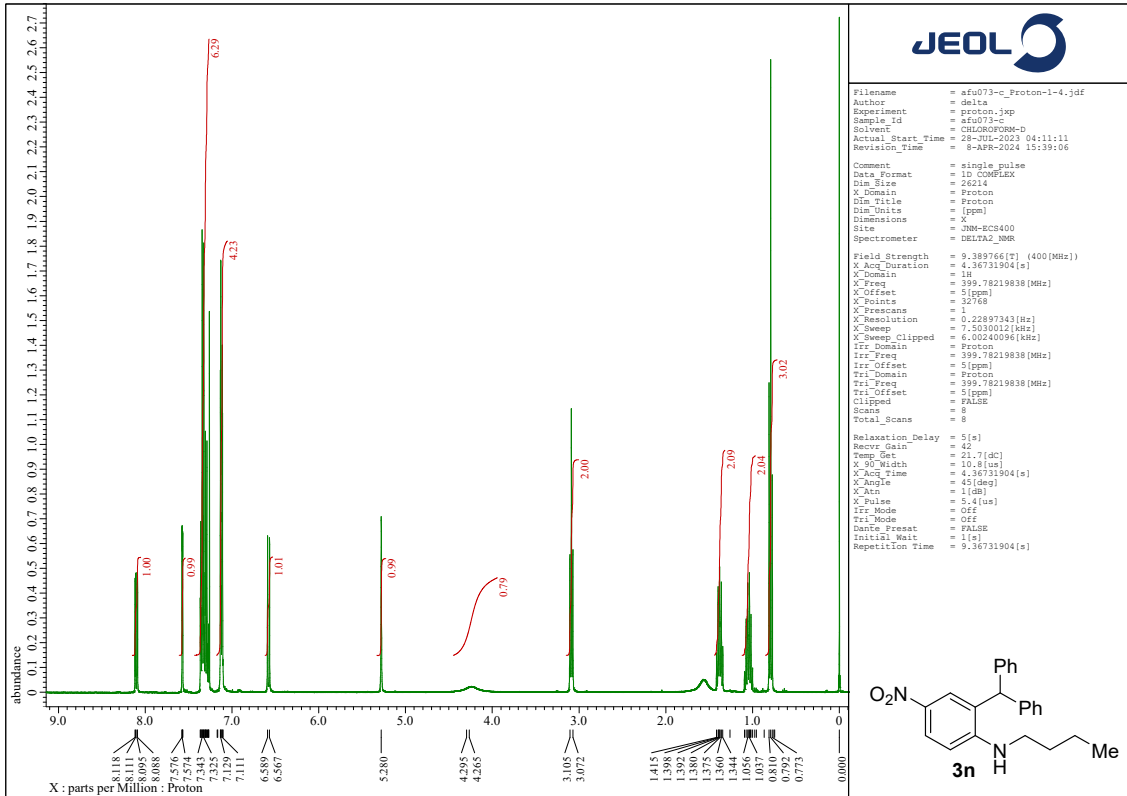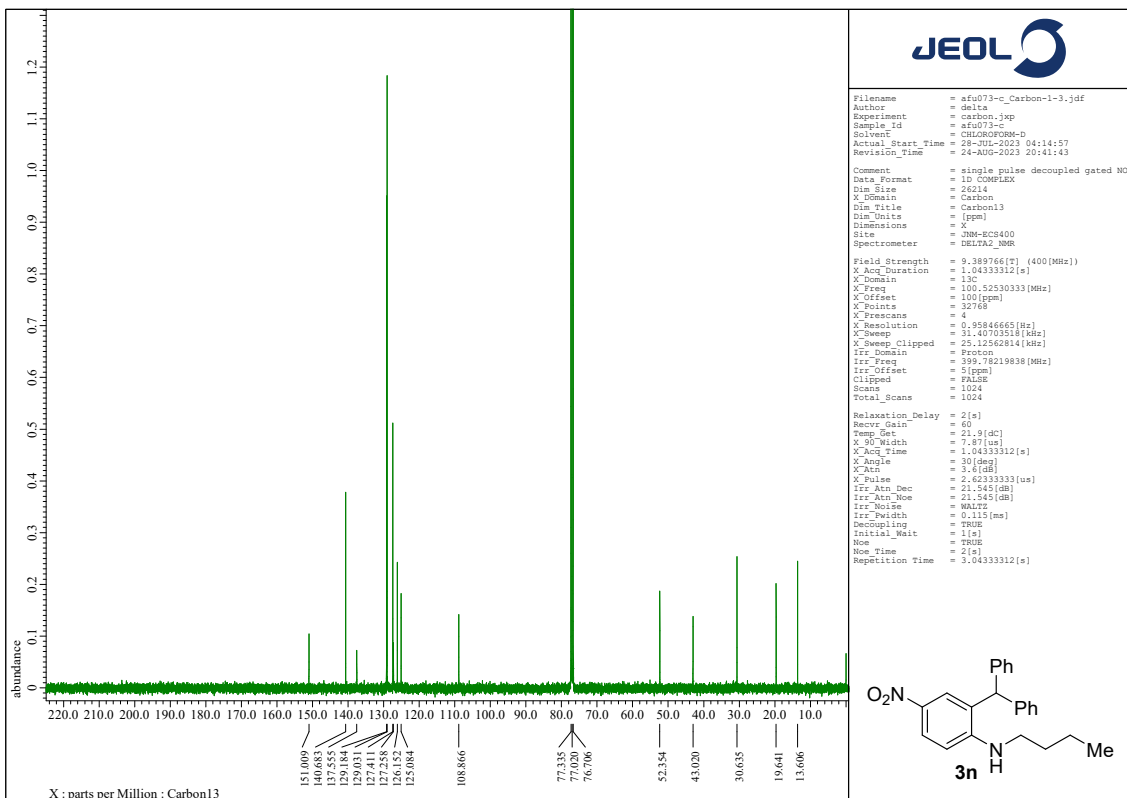

2-Benzhydryl-N-isopropyl-4-nitroaniline **3o**

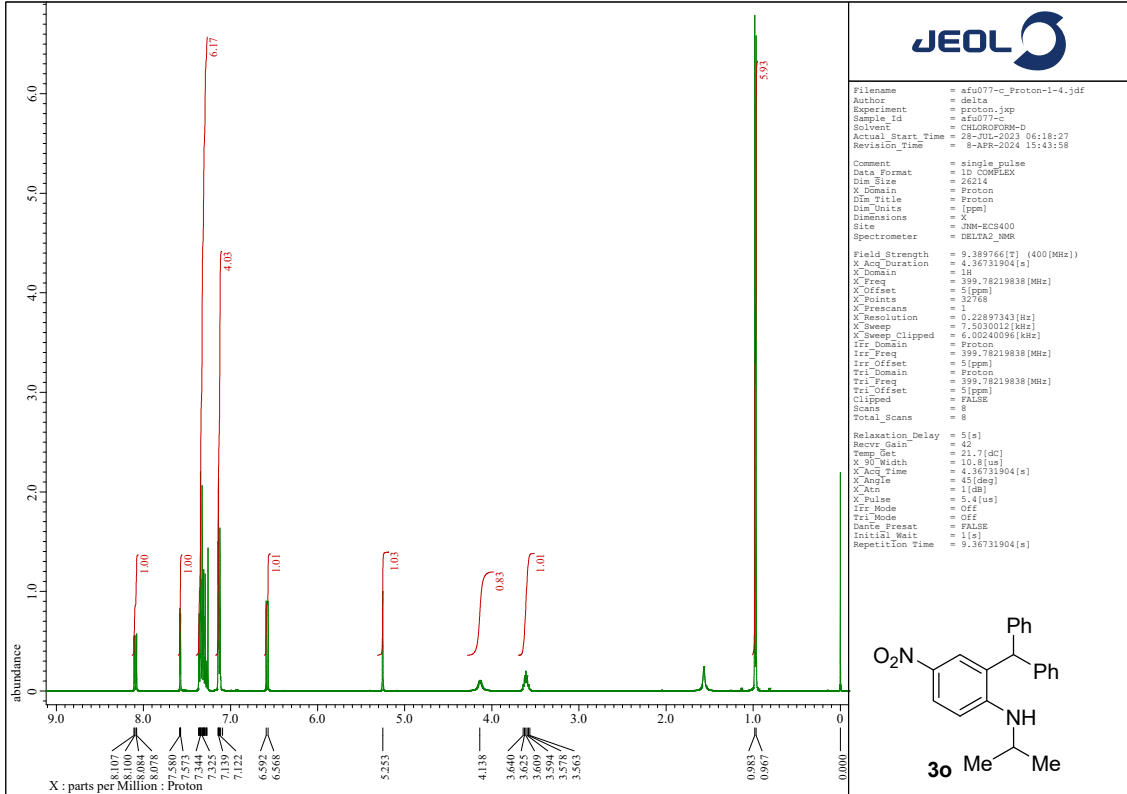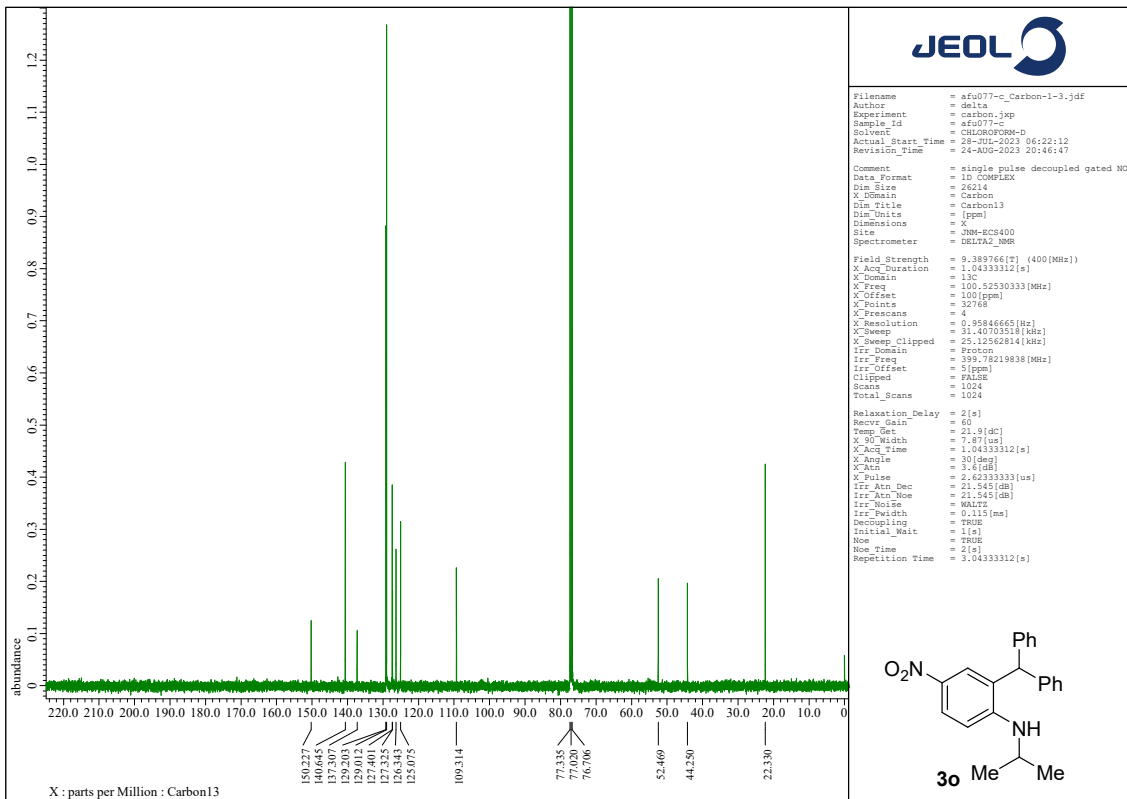

2-[(2-Benzhydryl-4-nitrophenyl)amino]ethan-1-ol **3p**

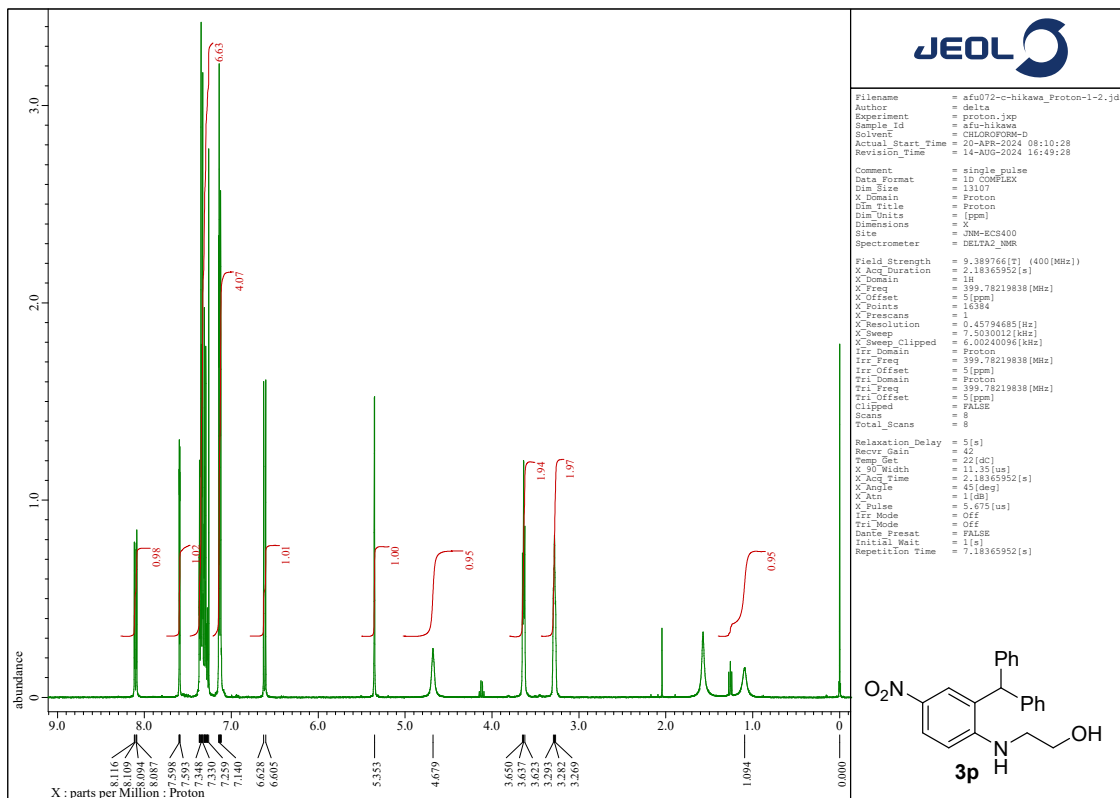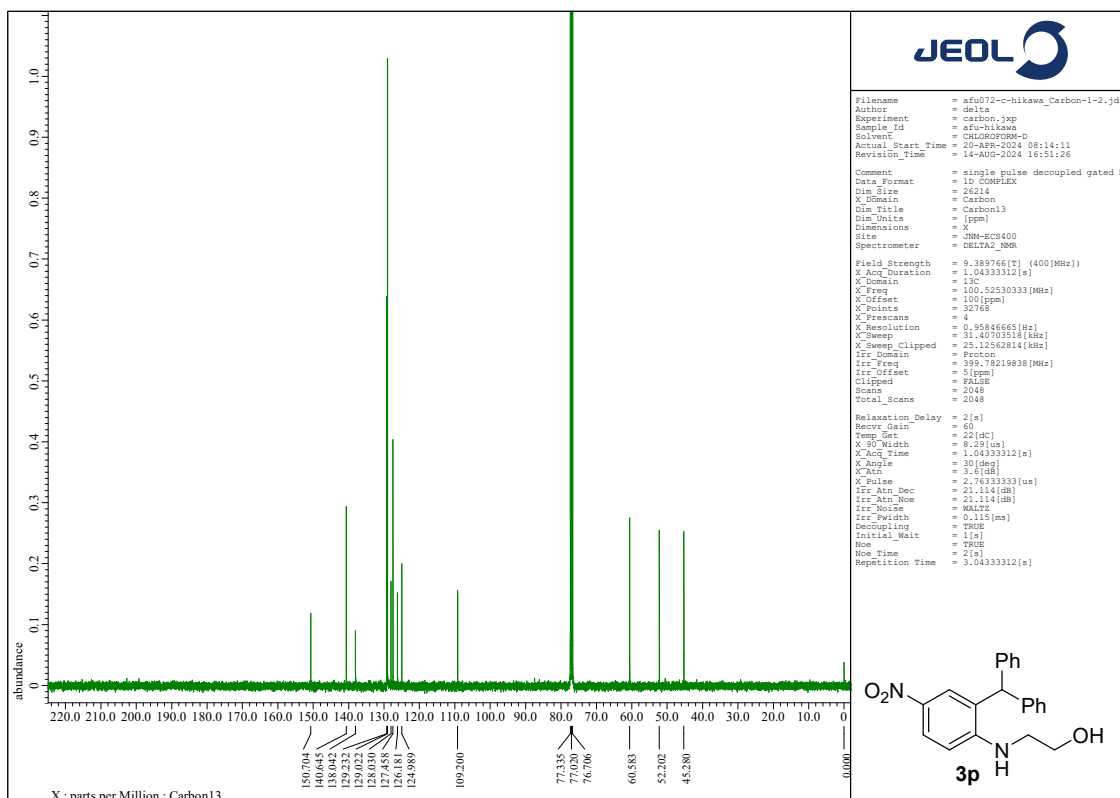

2-Benzhydryl-*N*-(2-(benzhydryloxy)ethyl)-4-nitroaniline **3p'**

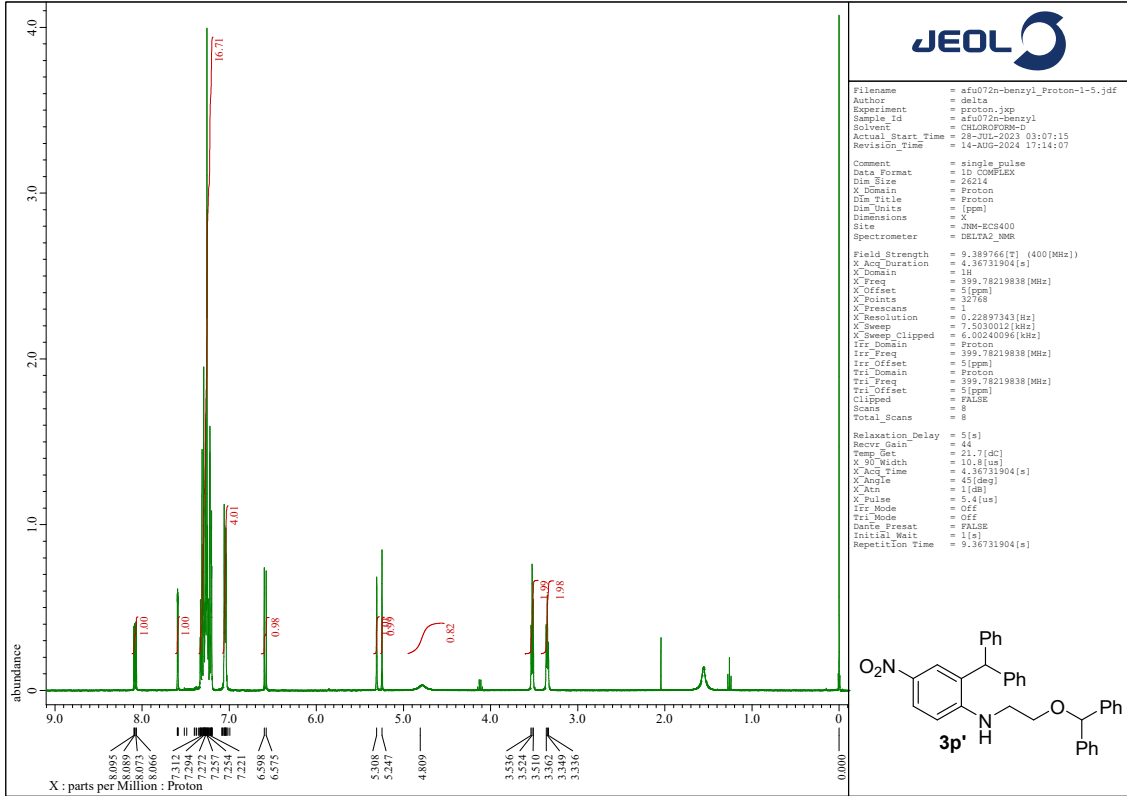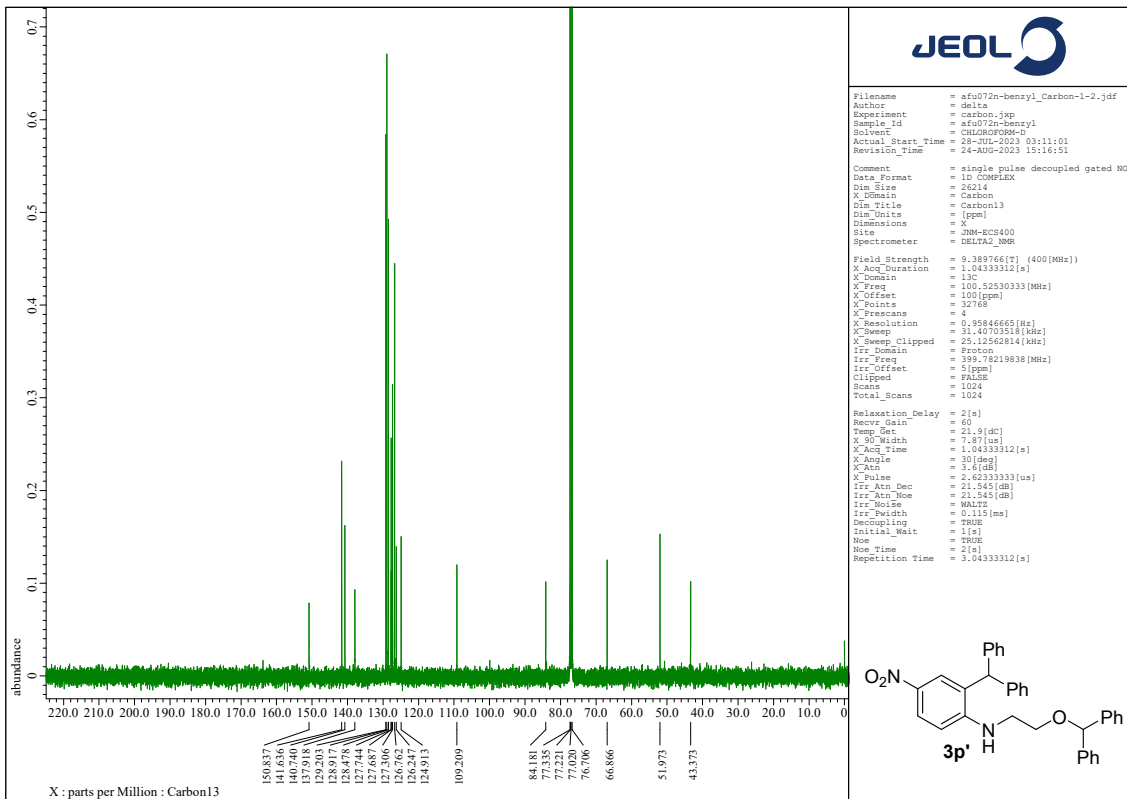

Supplement: d4ob01234h1.pdf [file d4ob01234h1.pdf]
